# Supplementary material for: Chromosome-level genome assembly of Ajuga decumbens
Source: Front Plant Sci. 2024 Jun 19;15:1413468. doi: 10.3389/fpls.2024.1413468 (PMC11220202; doi:10.3389/fpls.2024.1413468)
Supplement: Supplementary file 1 [file Table_1.xlsx]

## Sheet: Table S1
Table S1 Summary of sequence data.
Sequence types	number of reads	Total length (bp)
Pacbio HiFi read	1072368	17851262876
HI-C read	R1:372,961,87 R2:372,961,876	R1:55,944,281,400 R2:55,944,281,400
RNA-Seq of leaf	R1:31,286,739 R2:31,286,739	R1:4,693,010,850 R2:4,693,010,850
RNA-Seq of stem	R1:23,194,087 R2:23,194,087	R1:3,479,113,050 R2:3,479,113,050
RNA-Seq of root	R1:28,691,433 R2:28,691,433	R1:4,303,714,950 R2:4,303,714,950

## Sheet: Table S2
Table S2 Genomic Data Statistics
	HIFI assembly result	HI-C scaffold result
Sum (bp)	1143142362	1143142362
Number of sequences	1666	1406
Number of chromosomes		16
Largest length (bp)	11836136	84625792
N50 (bp)	2,086,049, n = 166	64,855,482 n=8
GC content (%)	38.11	38.11

## Sheet: Table S3
Table S3 Statistics of Genome Repeat Proportions
Class	Type	Ratios (%)
Class I TEs	Gypsy	31.54
Class I TEs	Copia	12.19
Class I TEs	unknown	13.2
Class II TEs	TIR	9.87
Class II TEs	helitron	9.3

## Sheet: Table S4
Table S4 Statistics of Genome Repeat Proportions
Type
Number of protein-coding genes	32452
Mean CDS length (bp)	1184
Mean intron length (bp)	445
Mean exon length (bp)	258.8
Mean exons per gene	4.59

## Sheet: Table S5
Table S5 Sources of the 11 plant sequences used in phylogenetic tree construction
	Species	Sources	Accession number/url	Number
1	Amborella trichopoda	NCBI	GCF_000471905.2	17515
2	Oryza sativa	NCBI	GCF_001433935.1	31614
3	Ajuga decumbens	This work		32452
4	Leonurus_japonicus	CNGB	GWHBQCV00000000	28652
5	Tectona grandis	GigaDB	http://gigadb.org/dataset/100550	26022
6	Salvia miltiorrhiza	NCBI	GCF_028751815.1	36725
7	Coffea canephora	NCBI	GCA_900059795.1	25574
8	Solanum lycopersicum	NCBI	GCF_000188115.5	27202
9	Theobroma cacao	NCBI	GCF_000208745.1	14856
10	Arabidopsis thaliana	NCBI	GCF_000001735.4	41025
11	Vitis vinifera	NCBI	GCF_000003745.3	26058

## Sheet: Table S6
Table S6 Summary of Single-copy Genes.construction
cluster_name	protein_number	swiss_prot_id	go_annotation	protein_list
cluster9086	11	N/A	N/A	Arabidopsis_thaliana|NP_680733.1;Theobroma_cacao|XP_017978775.1;Amborella_trichopoda|XP_006841849.1;Coffea_canephora|CDP17922.1;Tectona_grandis|Tg17g03530.t1;Vitis_vinifera|XP_010646355.1;Solanum_lycopersicum|XP_010327230.1;Leonurus_japonicus|Lj1g11490.1;Oryza_sativa|XP_015635672.1;Ajuga_decumbens|g11710.t1;Salvia_miltiorrhiza|XP_057806699.1
cluster9087	11	P83291	GO:0009651; P:response to salt stress; IEP:TAIR	Arabidopsis_thaliana|NP_568391.1;Theobroma_cacao|XP_007013383.1;Amborella_trichopoda|XP_006842829.1;Coffea_canephora|CDP10379.1;Tectona_grandis|Tg01g10130.t1;Vitis_vinifera|XP_002285073.1;Solanum_lycopersicum|XP_010321068.1;Leonurus_japonicus|Lj10g14970.1;Oryza_sativa|XP_015621896.1;Ajuga_decumbens|g27618.t1;Salvia_miltiorrhiza|XP_057768693.1
cluster9090	11	Q9SIP1	GO:0005777; C:peroxisome; IDA:TAIR	Arabidopsis_thaliana|NP_001318337.1;Theobroma_cacao|XP_007046397.1;Amborella_trichopoda|XP_020527678.1;Coffea_canephora|CDP09779.1;Tectona_grandis|Tg18g14600.t1;Vitis_vinifera|XP_019072607.1;Solanum_lycopersicum|XP_004252591.1;Leonurus_japonicus|Lj7g32840.1;Oryza_sativa|XP_015630997.1;Ajuga_decumbens|g28426.t1;Salvia_miltiorrhiza|XP_057764257.1
cluster9094	11	Q9LLE8	GO:0009416; P:response to light stimulus; IEP:TAIR	Arabidopsis_thaliana|NP_180193.1;Theobroma_cacao|XP_017983496.1;Amborella_trichopoda|XP_006843898.1;Coffea_canephora|CDP17887.1;Tectona_grandis|Tg05g03670.t1;Vitis_vinifera|XP_002282234.1;Solanum_lycopersicum|XP_004245205.1;Leonurus_japonicus|Lj3g04000.1;Oryza_sativa|XP_015632380.1;Ajuga_decumbens|g27961.t1;Salvia_miltiorrhiza|XP_057799383.1
cluster9104	11	O48529	GO:0016021; C:integral component of membrane; IEA:UniProtKB-KW	Arabidopsis_thaliana|NP_565969.1;Theobroma_cacao|XP_017977212.1;Amborella_trichopoda|XP_020530564.1;Coffea_canephora|CDP20020.1;Tectona_grandis|Tg01g01280.t1;Vitis_vinifera|XP_002278312.1;Solanum_lycopersicum|XP_004234761.1;Leonurus_japonicus|Lj10g17860.1;Oryza_sativa|XP_015610700.1;Ajuga_decumbens|g26624.t1;Salvia_miltiorrhiza|XP_057783463.1
cluster9112	11	Q8L5U0	GO:0009585; P:red, far-red light phototransduction; IEA:UniProtKB-KW	Arabidopsis_thaliana|NP_199111.1;Theobroma_cacao|XP_007017491.1;Amborella_trichopoda|XP_006856066.1;Coffea_canephora|CDP07538.1;Tectona_grandis|Tg18g04240.t1;Vitis_vinifera|XP_002283011.1;Solanum_lycopersicum|XP_004238244.1;Leonurus_japonicus|Lj4g15740.1;Oryza_sativa|XP_025879984.1;Ajuga_decumbens|g25665.t1;Salvia_miltiorrhiza|XP_057785797.1
cluster9130	11	Q9LS25	GO:0009507; C:chloroplast; IDA:TAIR	Arabidopsis_thaliana|NP_199470.1;Theobroma_cacao|XP_017973220.1;Amborella_trichopoda|XP_020524854.1;Coffea_canephora|CDP12991.1;Tectona_grandis|Tg16g05870.t1;Vitis_vinifera|XP_002278451.1;Solanum_lycopersicum|XP_004245879.1;Leonurus_japonicus|Lj3g11960.1;Oryza_sativa|XP_015631135.1;Ajuga_decumbens|g10866.t1;Salvia_miltiorrhiza|XP_057775746.1
cluster9134	11	O81845	GO:0009853; P:photorespiration; IMP:TAIR	Arabidopsis_thaliana|NP_190979.1;Amborella_trichopoda|XP_011624710.1;Coffea_canephora|CDP06526.1;Tectona_grandis|Tg13g11890.t1;Vitis_vinifera|XP_002277421.1;Solanum_lycopersicum|NP_001234584.1;Oryza_sativa|XP_015616794.1;Ajuga_decumbens|g13863.t1;Salvia_miltiorrhiza|XP_057801291.1;Theobroma_cacao|XP_017983151.1;Leonurus_japonicus|Lj9g14160.1
cluster9141	11	Q9LU39	GO:0033014; P:tetrapyrrole biosynthetic process; IMP:TAIR	Arabidopsis_thaliana|NP_566678.1;Theobroma_cacao|XP_017979487.1;Amborella_trichopoda|XP_011623801.1;Coffea_canephora|CDO97756.1;Tectona_grandis|Tg11g00130.t1;Vitis_vinifera|XP_002274572.1;Solanum_lycopersicum|XP_004235509.1;Leonurus_japonicus|Lj3g00030.1;Oryza_sativa|XP_015648684.1;Ajuga_decumbens|g26370.t1;Salvia_miltiorrhiza|XP_057797050.1
cluster9152	11	Q9FIJ2	GO:0055114; P:oxidation-reduction process; IEA:UniProtKB-KW	Arabidopsis_thaliana|NP_199600.1;Theobroma_cacao|XP_007015506.1;Amborella_trichopoda|XP_006844759.1;Coffea_canephora|CDP09007.1;Tectona_grandis|Tg14g04950.t1;Vitis_vinifera|XP_002275228.1;Solanum_lycopersicum|XP_004241241.1;Leonurus_japonicus|Lj4g11570.1;Oryza_sativa|XP_015633769.1;Ajuga_decumbens|g22985.t1;Salvia_miltiorrhiza|XP_057782814.1
cluster9164	11	Q9ZPH2	GO:0009408; P:response to heat; IMP:TAIR	Arabidopsis_thaliana|NP_192404.1;Theobroma_cacao|XP_007025641.1;Amborella_trichopoda|XP_006827774.1;Coffea_canephora|CDO99552.1;Tectona_grandis|Tg02g15010.t1;Vitis_vinifera|XP_010655426.1;Solanum_lycopersicum|XP_004232864.1;Leonurus_japonicus|Lj1g29820.1;Oryza_sativa|XP_025876758.1;Ajuga_decumbens|g16397.t1;Salvia_miltiorrhiza|XP_057764504.1
cluster9168	11	Q9SNC6	GO:2000028; P:regulation of photoperiodism, flowering; IMP:CACAO	Arabidopsis_thaliana|NP_190235.1;Theobroma_cacao|XP_017983440.1;Amborella_trichopoda|XP_020520986.1;Coffea_canephora|CDP09042.1;Tectona_grandis|Tg18g05890.t1;Vitis_vinifera|XP_002283992.1;Solanum_lycopersicum|XP_004250960.1;Leonurus_japonicus|Lj5g10430.1;Oryza_sativa|XP_015632795.1;Ajuga_decumbens|g3747.t1;Salvia_miltiorrhiza|XP_057772169.1
cluster9172	11	Q9CAF2	GO:0019693; P:ribose phosphate metabolic process; IBA:GO_Central	Arabidopsis_thaliana|NP_187673.1;Theobroma_cacao|XP_007010468.1;Amborella_trichopoda|XP_011627136.1;Coffea_canephora|CDO99932.1;Tectona_grandis|Tg12g04010.t1;Vitis_vinifera|XP_002263671.1;Solanum_lycopersicum|XP_004249945.1;Leonurus_japonicus|Lj2g08360.1;Oryza_sativa|XP_015633463.1;Ajuga_decumbens|g1344.t1;Salvia_miltiorrhiza|XP_057778677.1
cluster9175	11	N/A	N/A	Arabidopsis_thaliana|NP_567246.1;Theobroma_cacao|XP_017970680.1;Amborella_trichopoda|XP_006828256.1;Coffea_canephora|CDP03628.1;Tectona_grandis|Tg14g12870.t1;Vitis_vinifera|XP_002275123.1;Solanum_lycopersicum|XP_010321847.1;Leonurus_japonicus|Lj2g27010.1;Oryza_sativa|XP_015634555.1;Ajuga_decumbens|g22331.t1;Salvia_miltiorrhiza|XP_057800855.1
cluster9176	11	Q9SRM5	GO:0016042; P:lipid catabolic process; IEA:UniProtKB-KW	Arabidopsis_thaliana|NP_566387.1;Theobroma_cacao|XP_007008988.1;Amborella_trichopoda|XP_011624764.1;Coffea_canephora|CDP14027.1;Tectona_grandis|Tg07g04930.t1;Vitis_vinifera|XP_002270907.1;Solanum_lycopersicum|XP_004240943.1;Leonurus_japonicus|Lj2g06600.1;Oryza_sativa|XP_015615500.1;Ajuga_decumbens|g1078.t1;Salvia_miltiorrhiza|XP_057788887.1
cluster9177	11	Q9M1X2	GO:0006631; P:fatty acid metabolic process; IMP:TAIR	Arabidopsis_thaliana|NP_567140.1;Theobroma_cacao|XP_017977137.1;Amborella_trichopoda|XP_006838250.1;Coffea_canephora|CDP03635.1;Tectona_grandis|Tg14g12750.t1;Vitis_vinifera|XP_002278163.1;Solanum_lycopersicum|XP_004242334.1;Leonurus_japonicus|Lj2g26860.1;Oryza_sativa|XP_015645628.1;Ajuga_decumbens|g22323.t1;Salvia_miltiorrhiza|XP_057800883.1
cluster9181	11	Q7XUA8	GO:0016787; F:hydrolase activity; IEA:UniProtKB-KW	Arabidopsis_thaliana|NP_200225.1;Theobroma_cacao|XP_007039231.1;Amborella_trichopoda|XP_006846441.1;Tectona_grandis|Tg06g17640.t1;Vitis_vinifera|XP_002269226.1;Solanum_lycopersicum|NP_001334623.1;Leonurus_japonicus|Lj2g01500.1;Oryza_sativa|XP_015636371.1;Ajuga_decumbens|g194.t1;Salvia_miltiorrhiza|XP_057800754.1;Coffea_canephora|CDP04977.1
cluster9184	11	N/A	N/A	Arabidopsis_thaliana|NP_187190.1;Theobroma_cacao|XP_017976654.1;Amborella_trichopoda|XP_020529687.1;Coffea_canephora|CDP15495.1;Tectona_grandis|Tg08g12200.t1;Vitis_vinifera|XP_002284169.1;Solanum_lycopersicum|XP_004230216.1;Leonurus_japonicus|Lj7g03840.1;Oryza_sativa|XP_015642652.1;Ajuga_decumbens|g2228.t1;Salvia_miltiorrhiza|XP_057778192.1
cluster9187	11	O22977	GO:0071555; P:cell wall organization; IEA:UniProtKB-KW	Coffea_canephora|CDP12230.1;Leonurus_japonicus|Lj3g31720.1;Theobroma_cacao|XP_017973783.1;Amborella_trichopoda|XP_006830297.1;Tectona_grandis|Tg11g07320.t1;Vitis_vinifera|XP_002279898.1;Solanum_lycopersicum|XP_004244657.1;Oryza_sativa|XP_015641832.1;Ajuga_decumbens|g10562.t1;Salvia_miltiorrhiza|XP_057773619.1;Arabidopsis_thaliana|NP_194145.1
cluster9188	11	P93788	GO:0007267; P:cell-cell signaling; NAS:UniProtKB	Coffea_canephora|CDP05208.1;Leonurus_japonicus|Lj2g11270.1;Theobroma_cacao|XP_017973064.1;Amborella_trichopoda|XP_006827693.1;Tectona_grandis|Tg15g07670.t1;Vitis_vinifera|XP_002267609.1;Solanum_lycopersicum|XP_004240737.1;Oryza_sativa|XP_015636194.1;Ajuga_decumbens|g664.t1;Salvia_miltiorrhiza|XP_057774377.1;Arabidopsis_thaliana|NP_190463.1
cluster9241	11	F4JP48	GO:0007129; P:synapsis; IMP:TAIR	Solanum_lycopersicum|XP_004244563.1;Theobroma_cacao|XP_017973426.1;Amborella_trichopoda|XP_020519239.1;Coffea_canephora|CDP09986.1;Tectona_grandis|Tg19g04450.t1;Vitis_vinifera|XP_019073746.1;Leonurus_japonicus|Lj7g31260.1;Oryza_sativa|XP_015645440.1;Ajuga_decumbens|g28704.t1;Salvia_miltiorrhiza|XP_057787029.1;Arabidopsis_thaliana|NP_001327948.1
cluster9252	11	Q9S9N9	GO:0009409; P:response to cold; IEP:TAIR	Solanum_lycopersicum|XP_004230394.1;Theobroma_cacao|XP_017979172.1;Amborella_trichopoda|XP_006836954.1;Coffea_canephora|CDO97679.1;Tectona_grandis|Tg06g11560.t1;Vitis_vinifera|XP_002269382.1;Leonurus_japonicus|Lj6g06460.1;Oryza_sativa|XP_015622444.1;Ajuga_decumbens|g20952.t1;Salvia_miltiorrhiza|XP_057804447.1;Arabidopsis_thaliana|NP_178345.1
cluster9256	11	Q9SAH3	GO:0006468; P:protein phosphorylation; IBA:GO_Central	Leonurus_japonicus|Lj4g02040.1;Theobroma_cacao|XP_007023449.1;Amborella_trichopoda|XP_006845360.1;Coffea_canephora|CDO98236.1;Tectona_grandis|Tg16g10150.t1;Vitis_vinifera|XP_010655096.1;Solanum_lycopersicum|XP_004235896.1;Oryza_sativa|XP_015648604.1;Ajuga_decumbens|g26230.t1;Salvia_miltiorrhiza|XP_057787828.1;Arabidopsis_thaliana|NP_178202.1
cluster9258	11	Q9M3A8	GO:0006349; P:regulation of gene expression by genetic imprinting; IMP:TAIR	Leonurus_japonicus|Lj2g00210.1;Theobroma_cacao|XP_017974056.1;Amborella_trichopoda|XP_006852636.1;Coffea_canephora|CDP05063.1;Tectona_grandis|Tg06g18630.t1;Vitis_vinifera|XP_010662856.1;Solanum_lycopersicum|XP_004234966.1;Oryza_sativa|XP_015615156.1;Ajuga_decumbens|g69.t1;Salvia_miltiorrhiza|XP_057785750.1;Arabidopsis_thaliana|NP_190493.1
cluster9262	11	Q02854	GO:0003954; F:NADH dehydrogenase activity; IEA:UniProtKB-EC	Leonurus_japonicus|Lj1g21550.1;Theobroma_cacao|XP_007026310.1;Amborella_trichopoda|XP_006826799.1;Coffea_canephora|CDP13742.1;Tectona_grandis|Tg02g08330.t1;Vitis_vinifera|XP_002274004.1;Solanum_lycopersicum|XP_004244076.1;Oryza_sativa|XP_015648550.1;Ajuga_decumbens|g15692.t1;Salvia_miltiorrhiza|XP_057765509.1;Arabidopsis_thaliana|NP_001190742.1
cluster9265	11	Q9LYK7	GO:2000232; P:regulation of rRNA processing; IMP:TAIR	Leonurus_japonicus|Lj7g14350.1;Theobroma_cacao|XP_017974860.1;Amborella_trichopoda|XP_006833187.1;Coffea_canephora|CDP02070.1;Tectona_grandis|Tg12g15790.t1;Vitis_vinifera|XP_002274778.1;Solanum_lycopersicum|XP_004243564.1;Oryza_sativa|XP_015631171.1;Ajuga_decumbens|g17599.t1;Salvia_miltiorrhiza|XP_057788529.1;Arabidopsis_thaliana|NP_196956.1
cluster9267	11	Q9FIT9	GO:0005737; C:cytoplasm; IEA:UniProtKB-SubCell	Leonurus_japonicus|Lj5g23990.1;Theobroma_cacao|XP_017979972.1;Amborella_trichopoda|XP_011621067.1;Coffea_canephora|CDP05809.1;Tectona_grandis|Tg17g07470.t1;Vitis_vinifera|XP_002282763.1;Solanum_lycopersicum|XP_004244161.1;Oryza_sativa|XP_015638251.1;Ajuga_decumbens|g12181.t1;Salvia_miltiorrhiza|XP_057790685.1;Arabidopsis_thaliana|NP_568810.1
cluster9281	11	Q9SXC9	GO:0030433; P:ubiquitin-dependent ERAD pathway; IMP:TAIR	Leonurus_japonicus|Lj3g17750.1;Theobroma_cacao|XP_017973470.1;Amborella_trichopoda|XP_020518838.1;Coffea_canephora|CDP16406.1;Tectona_grandis|TgUn195g00030.t1;Vitis_vinifera|XP_002280345.1;Solanum_lycopersicum|XP_004236144.1;Oryza_sativa|XP_015622855.1;Ajuga_decumbens|g30317.t1;Salvia_miltiorrhiza|XP_057806299.1;Arabidopsis_thaliana|NP_564288.1
cluster9283	11	Q8RXL1	GO:0010224; P:response to UV-B; IMP:TAIR	Leonurus_japonicus|Lj7g01830.1;Theobroma_cacao|XP_017971799.1;Amborella_trichopoda|XP_020525928.1;Coffea_canephora|CDO97230.1;Tectona_grandis|Tg08g15280.t1;Vitis_vinifera|XP_010647963.1;Solanum_lycopersicum|XP_010315208.1;Oryza_sativa|XP_015643387.1;Ajuga_decumbens|g1955.t1;Salvia_miltiorrhiza|XP_057782895.1;Arabidopsis_thaliana|NP_001119373.1
cluster9297	11	Q0WP44	GO:0048367; P:shoot system development; IMP:TAIR	Leonurus_japonicus|Lj5g22940.1;Theobroma_cacao|XP_017976874.1;Amborella_trichopoda|XP_020524976.1;Coffea_canephora|CDP18373.1;Tectona_grandis|Tg06g09610.t1;Vitis_vinifera|XP_002272927.1;Solanum_lycopersicum|XP_004230145.1;Oryza_sativa|XP_015611561.1;Ajuga_decumbens|g20612.t1;Salvia_miltiorrhiza|XP_057763698.1;Arabidopsis_thaliana|NP_001327303.1
cluster9300	11	N/A	N/A	Leonurus_japonicus|Lj7g23610.1;Theobroma_cacao|XP_017972309.1;Amborella_trichopoda|XP_006850193.1;Coffea_canephora|CDP01956.1;Tectona_grandis|Tg09g12230.t1;Vitis_vinifera|XP_002274615.1;Solanum_lycopersicum|XP_004236872.1;Oryza_sativa|XP_015639130.1;Ajuga_decumbens|g25650.t1;Salvia_miltiorrhiza|XP_057766175.1;Arabidopsis_thaliana|NP_566942.1
cluster9304	11	Q7DLR9	GO:0009651; P:response to salt stress; IEP:TAIR	Leonurus_japonicus|Lj5g14820.1;Theobroma_cacao|XP_017977172.1;Amborella_trichopoda|XP_006851904.1;Coffea_canephora|CDP09627.1;Tectona_grandis|Tg16g10010.t1;Vitis_vinifera|XP_002284989.1;Solanum_lycopersicum|XP_004251113.1;Oryza_sativa|XP_015651258.1;Ajuga_decumbens|g26217.t1;Salvia_miltiorrhiza|XP_057767772.1;Arabidopsis_thaliana|NP_176040.1
cluster9307	11	Q6ZY51	GO:0005982; P:starch metabolic process; IMP:TAIR	Leonurus_japonicus|Lj4g15150.1;Theobroma_cacao|XP_017975308.1;Amborella_trichopoda|XP_006845104.1;Coffea_canephora|CDP10310.1;Tectona_grandis|Tg18g01020.t1;Vitis_vinifera|XP_002265211.1;Solanum_lycopersicum|XP_004248008.1;Oryza_sativa|XP_015620009.1;Ajuga_decumbens|g9229.t1;Salvia_miltiorrhiza|XP_057798732.1;Arabidopsis_thaliana|NP_001119280.1
cluster9315	11	Q9C6T2	GO:0009451; P:RNA modification; IBA:GO_Central	Leonurus_japonicus|Lj3g12450.1;Theobroma_cacao|XP_017973404.1;Amborella_trichopoda|XP_011621956.1;Tectona_grandis|Tg05g07070.t1;Vitis_vinifera|XP_002275784.1;Solanum_lycopersicum|XP_004245945.1;Oryza_sativa|XP_015623245.1;Ajuga_decumbens|g28222.t1;Salvia_miltiorrhiza|XP_057802459.1;Arabidopsis_thaliana|NP_174474.1;Coffea_canephora|CDP11708.1
cluster9328	11	Q6P642	GO:0048471; C:perinuclear region of cytoplasm; IEA:UniProtKB-SubCell	Leonurus_japonicus|Lj7g04180.1;Theobroma_cacao|XP_017976138.1;Amborella_trichopoda|XP_011621901.1;Coffea_canephora|CDP17238.1;Tectona_grandis|Tg08g11440.t1;Vitis_vinifera|XP_003633609.1;Solanum_lycopersicum|XP_004230283.1;Oryza_sativa|XP_015628525.1;Ajuga_decumbens|g2271.t1;Salvia_miltiorrhiza|XP_057778794.1;Arabidopsis_thaliana|NP_564717.1
cluster9329	11	Q55680	GO:0004672; F:protein kinase activity; IEA:InterPro	Leonurus_japonicus|Lj8g09470.1;Theobroma_cacao|XP_017975336.1;Amborella_trichopoda|XP_020529134.1;Coffea_canephora|CDO99419.1;Tectona_grandis|Tg04g11460.t1;Vitis_vinifera|XP_010650257.1;Solanum_lycopersicum|XP_004247833.1;Oryza_sativa|XP_025878778.1;Ajuga_decumbens|g19287.t1;Salvia_miltiorrhiza|XP_057772160.1;Arabidopsis_thaliana|NP_566745.1
cluster9334	11	Q94AX4	GO:0051596; P:methylglyoxal catabolic process; IMP:UniProtKB	Leonurus_japonicus|Lj6g00770.1;Theobroma_cacao|XP_017977104.1;Amborella_trichopoda|XP_020531267.1;Coffea_canephora|CDP10553.1;Tectona_grandis|Tg01g18360.t1;Vitis_vinifera|XP_002267321.1;Solanum_lycopersicum|XP_004250777.1;Oryza_sativa|XP_015644610.1;Ajuga_decumbens|g3841.t1;Salvia_miltiorrhiza|XP_057778356.1;Arabidopsis_thaliana|NP_568170.1
cluster9346	11	N/A	N/A	Leonurus_japonicus|Lj7g36160.1;Theobroma_cacao|XP_007031588.1;Amborella_trichopoda|XP_011626176.1;Coffea_canephora|CDP02059.1;Tectona_grandis|Tg09g13890.t1;Vitis_vinifera|XP_002273651.1;Solanum_lycopersicum|XP_004231849.1;Oryza_sativa|XP_015635379.1;Ajuga_decumbens|g24003.t1;Salvia_miltiorrhiza|XP_057770291.1;Arabidopsis_thaliana|NP_001078684.1
cluster9353	11	Q54I39	GO:0015031; P:protein transport; IEA:InterPro	Leonurus_japonicus|Lj6g22730.1;Theobroma_cacao|XP_017970799.1;Amborella_trichopoda|XP_020520053.1;Coffea_canephora|CDP00601.1;Tectona_grandis|Tg11g10480.t1;Vitis_vinifera|XP_010647794.1;Solanum_lycopersicum|XP_004238941.1;Oryza_sativa|XP_015632740.1;Ajuga_decumbens|g10173.t1;Salvia_miltiorrhiza|XP_057810608.1;Arabidopsis_thaliana|NP_172792.1
cluster9371	11	Q9SIK7	GO:0016485; P:protein processing; IEA:InterPro	Leonurus_japonicus|Lj3g22710.1;Theobroma_cacao|XP_017973444.1;Amborella_trichopoda|XP_006845842.1;Coffea_canephora|CDP17383.1;Tectona_grandis|TgUn396g00060.t1;Vitis_vinifera|XP_010663237.1;Solanum_lycopersicum|XP_004236049.1;Oryza_sativa|XP_015632905.1;Ajuga_decumbens|g30120.t1;Salvia_miltiorrhiza|XP_057805045.1;Arabidopsis_thaliana|NP_180551.1
cluster9376	11	B8AN27	GO:0007186; P:G protein-coupled receptor signaling pathway; IEA:InterPro	Leonurus_japonicus|Lj8g01890.1;Solanum_lycopersicum|XP_010326697.1;Ajuga_decumbens|g21460.t1;Salvia_miltiorrhiza|XP_057771505.1;Arabidopsis_thaliana|NP_850746.1;Oryza_sativa|XP_015628756.1;Theobroma_cacao|XP_007034913.1;Amborella_trichopoda|XP_020520020.1;Coffea_canephora|CDO99128.1;Tectona_grandis|Tg08g03020.t1;Vitis_vinifera|XP_002283821.1
cluster9377	11	P0CB23	N/A	Amborella_trichopoda|XP_020528171.1;Oryza_sativa|XP_015629622.1;Theobroma_cacao|XP_017975275.1;Coffea_canephora|CDP01565.1;Tectona_grandis|Tg07g13610.t1;Solanum_lycopersicum|XP_004250520.1;Leonurus_japonicus|Lj6g26390.1;Ajuga_decumbens|g18221.t1;Salvia_miltiorrhiza|XP_057807163.1;Arabidopsis_thaliana|NP_001328886.1;Vitis_vinifera|XP_010646792.1
cluster9386	11	O82291	GO:0009579; C:thylakoid; IDA:TAIR	Leonurus_japonicus|Lj7g32260.1;Theobroma_cacao|XP_017973328.1;Amborella_trichopoda|XP_006854055.1;Coffea_canephora|CDP18539.1;Tectona_grandis|Tg19g03330.t1;Vitis_vinifera|XP_002276479.1;Solanum_lycopersicum|XP_004245973.1;Oryza_sativa|XP_015614073.1;Ajuga_decumbens|g28857.t1;Salvia_miltiorrhiza|XP_057799215.1;Arabidopsis_thaliana|NP_181092.1
cluster9388	11	Q8H1E2	GO:0006099; P:tricarboxylic acid cycle; IBA:GO_Central	Leonurus_japonicus|Lj9g22420.1;Theobroma_cacao|XP_017985066.1;Amborella_trichopoda|XP_006843128.1;Coffea_canephora|CDO99815.1;Tectona_grandis|Tg07g01850.t1;Vitis_vinifera|XP_002265080.1;Solanum_lycopersicum|NP_001234056.1;Oryza_sativa|XP_015649513.1;Ajuga_decumbens|g7080.t1;Salvia_miltiorrhiza|XP_057789474.1;Arabidopsis_thaliana|NP_851214.1
cluster9395	11	Q9M117	GO:0010090; P:trichome morphogenesis; IMP:TAIR	Leonurus_japonicus|Lj10g03080.1;Theobroma_cacao|XP_007052282.1;Amborella_trichopoda|XP_006837331.1;Coffea_canephora|CDP09452.1;Tectona_grandis|Tg06g04770.t1;Vitis_vinifera|XP_003633894.1;Solanum_lycopersicum|XP_004229758.1;Oryza_sativa|XP_015618032.1;Ajuga_decumbens|g19687.t1;Salvia_miltiorrhiza|XP_057797439.1;Arabidopsis_thaliana|NP_567216.1
cluster9399	11	O22265	GO:0009644; P:response to high light intensity; IEP:TAIR	Leonurus_japonicus|Lj7g09490.1;Theobroma_cacao|XP_017972011.1;Amborella_trichopoda|XP_006829166.1;Coffea_canephora|CDP10934.1;Tectona_grandis|Tg05g12690.t1;Vitis_vinifera|XP_002282206.1;Solanum_lycopersicum|XP_010316268.1;Oryza_sativa|XP_015629751.1;Ajuga_decumbens|g2398.t1;Salvia_miltiorrhiza|XP_057798314.1;Arabidopsis_thaliana|NP_566101.1
cluster9402	11	Q9M1X0	GO:0006412; P:translation; IBA:GO_Central	Leonurus_japonicus|Lj2g26920.1;Theobroma_cacao|XP_017969559.1;Amborella_trichopoda|XP_011621415.1;Coffea_canephora|CDP03634.1;Tectona_grandis|Tg14g12800.t1;Vitis_vinifera|XP_010651961.1;Solanum_lycopersicum|XP_004247170.1;Oryza_sativa|XP_015644851.1;Ajuga_decumbens|g22325.t1;Salvia_miltiorrhiza|XP_057800878.1;Arabidopsis_thaliana|NP_567141.1
cluster9403	11	Q8W4P9	GO:0016192; P:vesicle-mediated transport; IMP:TAIR	Leonurus_japonicus|Lj5g02350.1;Theobroma_cacao|XP_017983464.1;Amborella_trichopoda|XP_020523607.1;Coffea_canephora|CDP12670.1;Tectona_grandis|Tg01g13650.t1;Vitis_vinifera|XP_010656892.1;Solanum_lycopersicum|XP_010323402.1;Oryza_sativa|XP_015636168.1;Ajuga_decumbens|g4670.t1;Salvia_miltiorrhiza|XP_057792014.1;Arabidopsis_thaliana|NP_566837.1
cluster9404	11	O13741	GO:0006364; P:rRNA processing; ISO:PomBase	Leonurus_japonicus|Lj10g09130.1;Theobroma_cacao|XP_017985000.1;Amborella_trichopoda|XP_006848692.1;Coffea_canephora|CDP00042.1;Tectona_grandis|Tg07g10030.t1;Vitis_vinifera|XP_002279438.1;Solanum_lycopersicum|NP_001305061.1;Oryza_sativa|XP_015640419.1;Ajuga_decumbens|g32255.t1;Salvia_miltiorrhiza|XP_057809537.1;Arabidopsis_thaliana|NP_191094.1
cluster9406	11	Q39061	GO:0006397; P:mRNA processing; IEA:UniProtKB-KW	Leonurus_japonicus|Lj6g00450.1;Theobroma_cacao|XP_007028003.1;Amborella_trichopoda|XP_006857530.1;Coffea_canephora|CDP10586.1;Tectona_grandis|Tg01g18090.t1;Vitis_vinifera|XP_002264127.1;Solanum_lycopersicum|XP_004228672.1;Oryza_sativa|XP_015647125.1;Ajuga_decumbens|g3815.t1;Salvia_miltiorrhiza|XP_057778021.1;Arabidopsis_thaliana|NP_190806.1
cluster9407	11	Q1G3L1	GO:0090351; P:seedling development; IMP:TAIR	Leonurus_japonicus|Lj7g12520.1;Theobroma_cacao|XP_017981638.1;Amborella_trichopoda|XP_020528163.1;Coffea_canephora|CDP20670.1;Tectona_grandis|Tg05g16220.t1;Vitis_vinifera|XP_002263208.1;Solanum_lycopersicum|XP_004245573.1;Oryza_sativa|XP_015628145.1;Ajuga_decumbens|g2747.t1;Salvia_miltiorrhiza|XP_057805509.1;Arabidopsis_thaliana|NP_001031562.1
cluster9409	11	Q05212	GO:0009409; P:response to cold; IEP:TAIR	Leonurus_japonicus|Lj4g23670.1;Theobroma_cacao|XP_017976983.1;Amborella_trichopoda|XP_006843674.1;Coffea_canephora|CDP08545.1;Tectona_grandis|Tg08g04120.t1;Vitis_vinifera|XP_010659918.1;Solanum_lycopersicum|XP_004230119.1;Oryza_sativa|XP_015621494.1;Ajuga_decumbens|g8841.t1;Salvia_miltiorrhiza|XP_057783566.1;Arabidopsis_thaliana|NP_566241.1
cluster9437	11	N/A	N/A	Leonurus_japonicus|Lj8g10120.1;Theobroma_cacao|XP_007033747.1;Amborella_trichopoda|XP_006858892.1;Coffea_canephora|CDP10869.1;Tectona_grandis|Tg04g14530.t1;Vitis_vinifera|XP_002273955.1;Solanum_lycopersicum|NP_001334106.1;Oryza_sativa|XP_015621692.1;Ajuga_decumbens|g19145.t1;Salvia_miltiorrhiza|XP_057778264.1;Arabidopsis_thaliana|NP_563747.1
cluster9450	11	Q9LS40	GO:0009627; P:systemic acquired resistance; IMP:TAIR	Leonurus_japonicus|Lj9g21340.1;Theobroma_cacao|XP_017971928.1;Amborella_trichopoda|XP_006843768.1;Coffea_canephora|CDP20336.1;Tectona_grandis|Tg15g13050.t1;Vitis_vinifera|XP_002281973.1;Solanum_lycopersicum|XP_004238952.1;Oryza_sativa|XP_015626594.1;Ajuga_decumbens|g7425.t1;Salvia_miltiorrhiza|XP_057765716.1;Arabidopsis_thaliana|NP_173922.1
cluster9458	11	P81748	GO:0050178; F:phenylpyruvate tautomerase activity; IEA:UniProtKB-EC	Leonurus_japonicus|Lj5g02410.1;Theobroma_cacao|XP_007014427.1;Amborella_trichopoda|XP_006850878.1;Coffea_canephora|CDP15783.1;Tectona_grandis|Tg01g13710.t1;Vitis_vinifera|XP_002264373.1;Solanum_lycopersicum|XP_004242799.1;Oryza_sativa|XP_015643567.1;Ajuga_decumbens|g19682.t1;Salvia_miltiorrhiza|XP_057767295.1;Arabidopsis_thaliana|NP_200527.1
cluster9469	11	Q9XYL0	GO:0006972; P:hyperosmotic response; IEP:dictyBase	Leonurus_japonicus|Lj1g14780.1;Theobroma_cacao|XP_017978151.1;Amborella_trichopoda|XP_006847786.1;Coffea_canephora|CDO96877.1;Tectona_grandis|Tg17g01710.t1;Vitis_vinifera|XP_002264996.1;Solanum_lycopersicum|XP_004233068.1;Oryza_sativa|XP_015638884.1;Ajuga_decumbens|g11433.t1;Salvia_miltiorrhiza|XP_057797646.1;Arabidopsis_thaliana|NP_199382.1
cluster9476	11	Q91V83	GO:0032006; P:regulation of TOR signaling; ISS:UniProtKB	Leonurus_japonicus|Lj1g04640.1;Theobroma_cacao|XP_017985335.1;Amborella_trichopoda|XP_006853326.1;Coffea_canephora|CDP13581.1;Tectona_grandis|Tg17g05620.t1;Vitis_vinifera|XP_010645147.1;Solanum_lycopersicum|XP_010313969.1;Oryza_sativa|XP_015614071.1;Ajuga_decumbens|g11882.t1;Salvia_miltiorrhiza|XP_057794638.1;Arabidopsis_thaliana|NP_001322933.1
cluster9491	11	Q8GXG1	GO:0051604; P:protein maturation; IBA:GO_Central	Leonurus_japonicus|Lj4g20400.1;Theobroma_cacao|XP_007017138.1;Amborella_trichopoda|XP_020532200.1;Coffea_canephora|CDP01286.1;Tectona_grandis|Tg08g09260.t1;Vitis_vinifera|XP_002285006.1;Solanum_lycopersicum|NP_001333113.1;Oryza_sativa|XP_015635450.1;Ajuga_decumbens|g8433.t1;Salvia_miltiorrhiza|XP_057779574.1;Arabidopsis_thaliana|NP_566536.1
cluster9502	11	Q9XGY4	GO:0072321; P:chaperone-mediated protein transport; IEA:InterPro	Leonurus_japonicus|Lj4g03900.1;Theobroma_cacao|XP_017972404.1;Amborella_trichopoda|XP_006844576.1;Coffea_canephora|CDP14990.1;Tectona_grandis|Tg16g09070.t1;Vitis_vinifera|XP_002284270.1;Solanum_lycopersicum|XP_004241454.1;Oryza_sativa|XP_015650330.1;Ajuga_decumbens|g26103.t1;Salvia_miltiorrhiza|XP_057804864.1;Arabidopsis_thaliana|NP_199894.1
cluster9508	11	F4KEY9	GO:0017196; P:N-terminal peptidyl-methionine acetylation; IBA:GO_Central	Leonurus_japonicus|Lj5g11350.1;Theobroma_cacao|XP_017983427.1;Amborella_trichopoda|XP_006828140.1;Coffea_canephora|CDP09253.1;Tectona_grandis|Tg18g07060.t1;Vitis_vinifera|XP_010650852.1;Solanum_lycopersicum|XP_004247050.1;Oryza_sativa|XP_015640326.1;Ajuga_decumbens|g3648.t1;Salvia_miltiorrhiza|XP_057772518.1;Arabidopsis_thaliana|NP_001331438.1
cluster9510	11	P49107	GO:0015979; P:photosynthesis; IEA:UniProtKB-KW	Leonurus_japonicus|Lj7g25880.1;Theobroma_cacao|XP_017981790.1;Amborella_trichopoda|XP_006842392.1;Coffea_canephora|CDP10980.1;Tectona_grandis|Tg09g02760.t1;Vitis_vinifera|XP_003631913.1;Solanum_lycopersicum|NP_001316061.1;Oryza_sativa|XP_015620198.1;Ajuga_decumbens|g24582.t1;Salvia_miltiorrhiza|XP_057770102.1;Arabidopsis_thaliana|NP_201209.1
cluster9528	11	Q94C32	GO:0006355; P:regulation of transcription, DNA-templated; IEA:InterPro	Leonurus_japonicus|Lj5g15690.1;Theobroma_cacao|XP_017969810.1;Amborella_trichopoda|XP_011628149.1;Coffea_canephora|CDP02542.1;Tectona_grandis|Tg07g07710.t1;Vitis_vinifera|XP_010652764.1;Solanum_lycopersicum|NP_001294924.1;Oryza_sativa|XP_015636894.1;Ajuga_decumbens|g18877.t1;Salvia_miltiorrhiza|XP_057806726.1;Arabidopsis_thaliana|NP_568021.1
cluster9534	11	N/A	N/A	Leonurus_japonicus|Lj5g08390.1;Theobroma_cacao|XP_017982503.1;Amborella_trichopoda|XP_006838750.1;Coffea_canephora|CDP07001.1;Tectona_grandis|Tg18g10690.t1;Vitis_vinifera|XP_002271178.1;Solanum_lycopersicum|XP_004251003.1;Oryza_sativa|XP_015629004.1;Ajuga_decumbens|g3274.t1;Salvia_miltiorrhiza|XP_057781897.1;Arabidopsis_thaliana|NP_172315.1
cluster9535	11	N/A	N/A	Leonurus_japonicus|Lj5g10610.1;Theobroma_cacao|XP_017983524.1;Amborella_trichopoda|XP_020524030.1;Coffea_canephora|CDP09111.1;Tectona_grandis|TgUn259g00070.t1;Vitis_vinifera|XP_010650981.1;Solanum_lycopersicum|XP_004247021.1;Oryza_sativa|XP_015630204.1;Ajuga_decumbens|g3730.t1;Salvia_miltiorrhiza|XP_057772399.1;Arabidopsis_thaliana|NP_851219.1
cluster9583	11	Q9FN15	GO:1990641; P:response to iron ion starvation; IMP:UniProtKB	Leonurus_japonicus|Lj7g22120.1;Theobroma_cacao|XP_007047463.1;Amborella_trichopoda|XP_006841993.1;Coffea_canephora|CDP02572.1;Tectona_grandis|Tg09g06230.t1;Vitis_vinifera|XP_002284127.1;Solanum_lycopersicum|XP_010316003.1;Oryza_sativa|XP_015628528.1;Ajuga_decumbens|g25025.t1;Salvia_miltiorrhiza|XP_057788660.1;Arabidopsis_thaliana|NP_201538.1
cluster9586	11	N/A	N/A	Leonurus_japonicus|Lj3g02270.1;Theobroma_cacao|XP_007012239.1;Amborella_trichopoda|XP_006853934.1;Coffea_canephora|CDP08236.1;Tectona_grandis|Tg05g01680.t1;Vitis_vinifera|XP_002277081.1;Solanum_lycopersicum|XP_025884429.1;Oryza_sativa|XP_015642976.1;Ajuga_decumbens|g27794.t1;Salvia_miltiorrhiza|XP_057799816.1;Arabidopsis_thaliana|NP_195022.1
cluster9619	11	Q640V9	GO:0046872; F:metal ion binding; IEA:UniProtKB-KW	Leonurus_japonicus|Lj6g00460.1;Theobroma_cacao|XP_007028002.1;Amborella_trichopoda|XP_011628682.1;Coffea_canephora|CDP10587.1;Tectona_grandis|Tg01g18100.t1;Vitis_vinifera|XP_010653259.1;Solanum_lycopersicum|XP_004240415.1;Oryza_sativa|XP_015647123.1;Ajuga_decumbens|g3816.t1;Salvia_miltiorrhiza|XP_057778020.1;Arabidopsis_thaliana|NP_974418.1
cluster9628	11	Q96DF8	GO:0007399; P:nervous system development; ISS:UniProtKB	Leonurus_japonicus|Lj9g19020.1;Theobroma_cacao|XP_017969719.1;Amborella_trichopoda|XP_006838454.1;Coffea_canephora|CDO99759.1;Tectona_grandis|Tg15g10340.t1;Vitis_vinifera|XP_002272703.1;Solanum_lycopersicum|XP_010323878.1;Oryza_sativa|XP_015644445.1;Ajuga_decumbens|g7679.t1;Salvia_miltiorrhiza|XP_057777116.1;Arabidopsis_thaliana|NP_187436.1
cluster9633	11	N/A	N/A	Leonurus_japonicus|Lj10g16120.1;Theobroma_cacao|XP_017982828.1;Amborella_trichopoda|XP_006854006.1;Coffea_canephora|CDP03195.1;Tectona_grandis|Tg02g05200.t1;Vitis_vinifera|XP_002282754.1;Solanum_lycopersicum|XP_004243151.1;Oryza_sativa|XP_015642975.1;Ajuga_decumbens|g25880.t1;Salvia_miltiorrhiza|XP_057768314.1;Arabidopsis_thaliana|NP_194681.1
cluster9645	11	Q94G00	GO:0003755; F:peptidyl-prolyl cis-trans isomerase activity; IEA:UniProtKB-KW	Oryza_sativa|XP_015634007.1;Theobroma_cacao|XP_017981503.1;Amborella_trichopoda|XP_006852979.1;Coffea_canephora|CDP01913.1;Tectona_grandis|Tg12g15900.t1;Vitis_vinifera|XP_002269631.1;Solanum_lycopersicum|XP_004230973.1;Ajuga_decumbens|g17625.t1;Arabidopsis_thaliana|NP_179395.1;Leonurus_japonicus|Lj7g14490.1;Salvia_miltiorrhiza|XP_057788580.1
cluster9649	11	Q9LU21	GO:0009773; P:photosynthetic electron transport in photosystem I; IMP:TAIR	Leonurus_japonicus|Lj3g14950.1;Theobroma_cacao|XP_017978847.1;Amborella_trichopoda|XP_006833432.1;Coffea_canephora|CDO98002.1;Tectona_grandis|Tg10g13580.t1;Vitis_vinifera|XP_002284206.1;Solanum_lycopersicum|XP_004245440.1;Oryza_sativa|XP_015645759.1;Ajuga_decumbens|g31111.t1;Salvia_miltiorrhiza|XP_057773080.1;Arabidopsis_thaliana|NP_188246.1
cluster9655	11	N/A	N/A	Leonurus_japonicus|Lj9g14990.1;Theobroma_cacao|XP_017977801.1;Amborella_trichopoda|XP_011627161.1;Coffea_canephora|CDP06675.1;Tectona_grandis|Tg02g01160.t1;Vitis_vinifera|XP_010653489.1;Solanum_lycopersicum|XP_004246731.1;Oryza_sativa|XP_015628336.1;Ajuga_decumbens|g13755.t1;Salvia_miltiorrhiza|XP_057801400.1;Arabidopsis_thaliana|NP_190917.1
cluster9683	11	Q9SJU8	GO:0032544; P:plastid translation; IBA:GO_Central	Leonurus_japonicus|Lj7g14160.1;Theobroma_cacao|XP_007042023.1;Amborella_trichopoda|XP_006854862.1;Coffea_canephora|CDO96986.1;Tectona_grandis|Tg12g15470.t1;Vitis_vinifera|XP_002268532.1;Solanum_lycopersicum|XP_004230989.1;Oryza_sativa|XP_015610880.1;Ajuga_decumbens|g17575.t1;Salvia_miltiorrhiza|XP_057788501.1;Arabidopsis_thaliana|NP_565506.1
cluster9697	11	Q9FG37	GO:0009624; P:response to nematode; IDA:UniProtKB	Leonurus_japonicus|Lj4g26060.1;Theobroma_cacao|XP_017977750.1;Amborella_trichopoda|XP_020526076.1;Coffea_canephora|CDP10165.1;Tectona_grandis|Tg01g00770.t1;Vitis_vinifera|XP_002275839.1;Solanum_lycopersicum|XP_010325937.1;Oryza_sativa|XP_015612607.1;Ajuga_decumbens|g26583.t1;Salvia_miltiorrhiza|XP_057782452.1;Arabidopsis_thaliana|NP_196286.1
cluster9793	11	Q93Y39	GO:0003723; F:RNA binding; IEA:UniProtKB-KW	Oryza_sativa|XP_015635674.1;Theobroma_cacao|XP_017975356.1;Amborella_trichopoda|XP_011620421.1;Coffea_canephora|CDO99361.1;Tectona_grandis|Tg04g11940.t1;Vitis_vinifera|XP_010650180.1;Solanum_lycopersicum|XP_004247775.1;Leonurus_japonicus|Lj8g08630.1;Ajuga_decumbens|g19353.t1;Salvia_miltiorrhiza|XP_057772159.1;Arabidopsis_thaliana|NP_001326753.1
cluster9796	11	Q96MD7	N/A	Oryza_sativa|XP_015627675.1;Theobroma_cacao|XP_007032841.1;Amborella_trichopoda|XP_011623377.1;Coffea_canephora|CDP02335.1;Tectona_grandis|Tg07g06340.t1;Vitis_vinifera|XP_002281105.1;Solanum_lycopersicum|XP_004232146.1;Leonurus_japonicus|Lj5g16850.1;Ajuga_decumbens|g18745.t1;Salvia_miltiorrhiza|XP_057768587.1;Arabidopsis_thaliana|NP_186871.1
cluster9799	11	Q9SR70	GO:0003755; F:peptidyl-prolyl cis-trans isomerase activity; IEA:UniProtKB-KW	Oryza_sativa|XP_015644660.1;Theobroma_cacao|XP_007027546.1;Amborella_trichopoda|XP_020520241.1;Coffea_canephora|CDP15323.1;Tectona_grandis|Tg01g16600.t1;Vitis_vinifera|XP_002264435.1;Solanum_lycopersicum|XP_004246591.1;Leonurus_japonicus|Lj5g13320.1;Ajuga_decumbens|g4301.t1;Salvia_miltiorrhiza|XP_057779301.1;Arabidopsis_thaliana|NP_187617.1
cluster9810	11	F4IY62	GO:0006048; P:UDP-N-acetylglucosamine biosynthetic process; IBA:GO_Central	Oryza_sativa|XP_015639560.1;Theobroma_cacao|XP_017984691.1;Amborella_trichopoda|XP_020524664.1;Coffea_canephora|CDP13987.1;Tectona_grandis|Tg07g05210.t1;Vitis_vinifera|XP_010658245.1;Solanum_lycopersicum|XP_025887255.1;Leonurus_japonicus|Lj8g13240.1;Ajuga_decumbens|g6685.t1;Salvia_miltiorrhiza|XP_057804638.1;Arabidopsis_thaliana|NP_567031.1
cluster9828	11	Q9SLB7	GO:0045893; P:positive regulation of transcription, DNA-templated; IDA:UniProtKB	Oryza_sativa|XP_015626197.1;Theobroma_cacao|XP_007050346.1;Amborella_trichopoda|XP_011625894.1;Coffea_canephora|CDP03724.1;Tectona_grandis|Tg05g10550.t1;Vitis_vinifera|XP_002263559.1;Solanum_lycopersicum|XP_010326442.1;Leonurus_japonicus|Lj10g08540.1;Ajuga_decumbens|g29417.t1;Salvia_miltiorrhiza|XP_057781260.1;Arabidopsis_thaliana|NP_565973.1
cluster9830	11	P54150	GO:0009416; P:response to light stimulus; IEP:UniProtKB	Oryza_sativa|XP_015614143.1;Theobroma_cacao|XP_007038245.1;Amborella_trichopoda|XP_006838578.1;Coffea_canephora|CDP05390.1;Tectona_grandis|Tg12g07780.t1;Vitis_vinifera|XP_002281325.1;Solanum_lycopersicum|NP_001307972.1;Leonurus_japonicus|Lj2g05020.1;Ajuga_decumbens|g853.t1;Salvia_miltiorrhiza|XP_057778521.1;Arabidopsis_thaliana|NP_194243.1
cluster9838	11	Q22799	GO:2000582; P:positive regulation of ATP-dependent microtubule motor activity, plus-end-directed; IBA:GO_Central	Oryza_sativa|XP_015621084.1;Theobroma_cacao|XP_017974156.1;Amborella_trichopoda|XP_011621906.1;Coffea_canephora|CDO98845.1;Tectona_grandis|Tg04g02300.t1;Vitis_vinifera|XP_002270438.1;Solanum_lycopersicum|XP_004229253.1;Leonurus_japonicus|Lj8g01260.1;Ajuga_decumbens|g21538.t1;Salvia_miltiorrhiza|XP_057772370.1;Arabidopsis_thaliana|NP_001329326.1
cluster9844	11	O82316	GO:0015250; F:water channel activity; IBA:GO_Central	Oryza_sativa|XP_015621438.1;Theobroma_cacao|XP_007012110.1;Amborella_trichopoda|XP_006833429.1;Coffea_canephora|CDP16197.1;Tectona_grandis|Tg05g02560.t1;Vitis_vinifera|NP_001304062.1;Solanum_lycopersicum|NP_001289841.1;Leonurus_japonicus|Lj3g02860.1;Ajuga_decumbens|g27857.t1;Salvia_miltiorrhiza|XP_057799627.1;Arabidopsis_thaliana|NP_180152.1
cluster9846	11	Q700D5	GO:0010224; P:response to UV-B; IEP:UniProtKB	Oryza_sativa|XP_025882649.1;Theobroma_cacao|XP_017976526.1;Amborella_trichopoda|XP_006829797.1;Coffea_canephora|CDP17639.1;Tectona_grandis|Tg13g13340.t1;Vitis_vinifera|XP_002268452.1;Solanum_lycopersicum|XP_004249369.1;Leonurus_japonicus|Lj1g31340.1;Ajuga_decumbens|g13609.t1;Salvia_miltiorrhiza|XP_057767331.1;Arabidopsis_thaliana|NP_001119241.1
cluster9847	11	N/A	N/A	Oryza_sativa|XP_015618542.1;Theobroma_cacao|XP_007035558.1;Amborella_trichopoda|XP_011627440.1;Coffea_canephora|CDP19541.1;Vitis_vinifera|XP_002272645.1;Solanum_lycopersicum|XP_004229227.1;Leonurus_japonicus|Lj4g25790.1;Arabidopsis_thaliana|NP_188777.1;Tectona_grandis|Tg08g01210.t1;Ajuga_decumbens|g9082.t1;Salvia_miltiorrhiza|XP_057806031.1
cluster9857	11	Q7SY10	GO:0016021; C:integral component of membrane; IEA:UniProtKB-KW	Oryza_sativa|XP_015641776.1;Theobroma_cacao|XP_017972988.1;Amborella_trichopoda|XP_006857852.1;Coffea_canephora|CDP05225.1;Tectona_grandis|Tg15g07790.t1;Vitis_vinifera|XP_002273881.1;Solanum_lycopersicum|XP_004234372.1;Leonurus_japonicus|Lj9g17050.1;Ajuga_decumbens|g7955.t1;Salvia_miltiorrhiza|XP_057774395.1;Arabidopsis_thaliana|NP_200031.1
cluster9881	11	N/A	N/A	Oryza_sativa|XP_015613011.1;Theobroma_cacao|XP_017977783.1;Coffea_canephora|CDP06752.1;Tectona_grandis|Tg02g00510.t1;Salvia_miltiorrhiza|XP_057805408.1;Arabidopsis_thaliana|NP_850276.1;Amborella_trichopoda|XP_006846826.1;Vitis_vinifera|XP_010653587.1;Solanum_lycopersicum|XP_004246648.1;Leonurus_japonicus|Lj2g12000.1;Ajuga_decumbens|g13708.t1
cluster9893	11	Q84WJ9	GO:0045842; P:positive regulation of mitotic metaphase/anaphase transition; IBA:GO_Central	Oryza_sativa|XP_015622995.1;Theobroma_cacao|XP_017981979.1;Amborella_trichopoda|XP_006853636.1;Coffea_canephora|CDP03273.1;Tectona_grandis|Tg16g00150.t1;Vitis_vinifera|XP_002283839.1;Solanum_lycopersicum|XP_004239265.1;Leonurus_japonicus|Lj3g10260.1;Ajuga_decumbens|g11078.t1;Salvia_miltiorrhiza|XP_057776510.1;Arabidopsis_thaliana|NP_197469.1
cluster9898	11	Q1EBC4	GO:0006364; P:rRNA processing; IEA:UniProtKB-KW	Oryza_sativa|XP_015637960.1;Theobroma_cacao|XP_007050901.1;Amborella_trichopoda|XP_006840560.1;Coffea_canephora|CDP20844.1;Tectona_grandis|Tg14g14230.t1;Vitis_vinifera|XP_002265366.1;Solanum_lycopersicum|XP_004247426.1;Leonurus_japonicus|Lj2g28580.1;Ajuga_decumbens|g22465.t1;Salvia_miltiorrhiza|XP_057782334.1;Arabidopsis_thaliana|NP_563668.1
cluster9900	11	N/A	N/A	Oryza_sativa|XP_015626056.1;Theobroma_cacao|XP_017984068.1;Amborella_trichopoda|XP_006850105.1;Coffea_canephora|CDP07727.1;Tectona_grandis|Tg06g06960.t1;Vitis_vinifera|XP_002264792.1;Solanum_lycopersicum|XP_004248536.1;Leonurus_japonicus|Lj10g05340.1;Ajuga_decumbens|g20294.t1;Salvia_miltiorrhiza|XP_057807680.1;Arabidopsis_thaliana|NP_568689.1
cluster9901	11	N/A	N/A	Oryza_sativa|XP_015637970.1;Theobroma_cacao|XP_007039180.1;Amborella_trichopoda|XP_011624218.1;Coffea_canephora|CDP12232.1;Tectona_grandis|Tg11g07330.t1;Vitis_vinifera|XP_002272716.1;Solanum_lycopersicum|XP_004245453.1;Leonurus_japonicus|Lj7g24210.1;Ajuga_decumbens|g10561.t1;Salvia_miltiorrhiza|XP_057781901.1;Arabidopsis_thaliana|NP_568796.1
cluster9903	11	Q9C6G0	GO:0003723; F:RNA binding; IBA:GO_Central	Oryza_sativa|XP_015636403.1;Theobroma_cacao|XP_017971507.1;Amborella_trichopoda|XP_020527145.1;Coffea_canephora|CDO97598.1;Tectona_grandis|Tg06g11810.t1;Vitis_vinifera|XP_010658001.1;Solanum_lycopersicum|XP_010314576.1;Leonurus_japonicus|Lj6g06350.1;Ajuga_decumbens|g565.t1;Salvia_miltiorrhiza|XP_057764321.1;Arabidopsis_thaliana|NP_176102.1
cluster9905	11	Q9LHI0	GO:0055114; P:oxidation-reduction process; IEA:UniProtKB-KW	Oryza_sativa|XP_015644779.1;Theobroma_cacao|XP_017984038.1;Amborella_trichopoda|XP_006832831.1;Coffea_canephora|CDP17138.1;Tectona_grandis|Tg06g08720.t1;Vitis_vinifera|XP_002262740.1;Solanum_lycopersicum|XP_004228330.1;Leonurus_japonicus|Lj1g01780.1;Ajuga_decumbens|g20483.t1;Salvia_miltiorrhiza|XP_057807913.1;Arabidopsis_thaliana|NP_566416.1
cluster9912	11	O82245	GO:0009651; P:response to salt stress; IEP:TAIR	Oryza_sativa|XP_015639220.1;Theobroma_cacao|XP_007050872.1;Coffea_canephora|CDP03510.1;Tectona_grandis|Tg14g14140.t1;Vitis_vinifera|XP_002263702.1;Solanum_lycopersicum|XP_004247434.1;Leonurus_japonicus|Lj2g28470.1;Ajuga_decumbens|g22456.t1;Salvia_miltiorrhiza|XP_057782354.1;Arabidopsis_thaliana|NP_566110.1;Amborella_trichopoda|XP_006840512.1
cluster9915	11	Q9SS48	GO:0006127; P:glycerophosphate shuttle; IMP:TAIR	Oryza_sativa|XP_015637157.1;Theobroma_cacao|XP_017984826.1;Amborella_trichopoda|XP_006848892.1;Coffea_canephora|CDO99782.1;Tectona_grandis|Tg12g02690.t1;Vitis_vinifera|XP_002273219.1;Solanum_lycopersicum|XP_004250055.1;Leonurus_japonicus|Lj9g07450.1;Ajuga_decumbens|g1546.t1;Salvia_miltiorrhiza|XP_057798898.1;Arabidopsis_thaliana|NP_187648.1
cluster9920	11	O81014	GO:0016114; P:terpenoid biosynthetic process; IEA:InterPro	Oryza_sativa|XP_015622133.1;Theobroma_cacao|XP_017983997.1;Amborella_trichopoda|XP_020528364.1;Coffea_canephora|CDP09703.1;Tectona_grandis|Tg14g08290.t1;Vitis_vinifera|XP_019076163.1;Solanum_lycopersicum|NP_001295301.1;Leonurus_japonicus|Lj2g20040.1;Ajuga_decumbens|g21998.t1;Salvia_miltiorrhiza|XP_057802185.1;Arabidopsis_thaliana|NP_180261.1
cluster9929	11	N/A	N/A	Oryza_sativa|XP_015621260.1;Theobroma_cacao|XP_007035594.1;Amborella_trichopoda|XP_006840541.1;Coffea_canephora|CDO98867.1;Tectona_grandis|Tg04g02570.t1;Vitis_vinifera|XP_003631973.1;Solanum_lycopersicum|XP_004229496.1;Leonurus_japonicus|Lj8g01380.1;Ajuga_decumbens|g21516.t1;Salvia_miltiorrhiza|XP_057772300.1;Arabidopsis_thaliana|NP_567477.1
cluster9931	11	N/A	N/A	Oryza_sativa|XP_015636381.1;Theobroma_cacao|XP_017973839.1;Coffea_canephora|CDP20474.1;Tectona_grandis|Tg16g13540.t1;Vitis_vinifera|XP_002265398.1;Solanum_lycopersicum|XP_004235396.1;Leonurus_japonicus|Lj6g04480.1;Ajuga_decumbens|g28887.t1;Salvia_miltiorrhiza|XP_057769989.1;Arabidopsis_thaliana|NP_001319578.1;Amborella_trichopoda|XP_006847899.1
cluster9936	11	N/A	N/A	Oryza_sativa|XP_015628125.1;Theobroma_cacao|XP_017973954.1;Amborella_trichopoda|XP_006857925.1;Coffea_canephora|CDP09816.1;Tectona_grandis|TgUn004g00080.t1;Vitis_vinifera|XP_002282656.1;Solanum_lycopersicum|XP_010325431.1;Leonurus_japonicus|Lj7g32410.1;Ajuga_decumbens|g28477.t1;Salvia_miltiorrhiza|XP_057763731.1;Arabidopsis_thaliana|NP_567381.1
cluster9954	11	Q84WL9	GO:0015031; P:protein transport; IEA:UniProtKB-KW	Oryza_sativa|XP_015618362.1;Theobroma_cacao|XP_007017794.1;Amborella_trichopoda|XP_006858418.1;Coffea_canephora|CDP07401.1;Tectona_grandis|Tg18g03520.t1;Vitis_vinifera|XP_002275803.1;Solanum_lycopersicum|XP_004238355.1;Leonurus_japonicus|Lj8g13050.1;Ajuga_decumbens|g9509.t1;Salvia_miltiorrhiza|XP_057766091.1;Arabidopsis_thaliana|NP_175219.1
cluster9963	11	Q9C942	GO:0010043; P:response to zinc ion; IEP:TAIR	Oryza_sativa|XP_015644703.1;Theobroma_cacao|XP_017978745.1;Amborella_trichopoda|XP_006841721.1;Coffea_canephora|CDO99600.1;Tectona_grandis|Tg02g14790.t1;Vitis_vinifera|XP_003634858.1;Solanum_lycopersicum|XP_004234129.1;Leonurus_japonicus|Lj1g29980.1;Ajuga_decumbens|g16374.t1;Salvia_miltiorrhiza|XP_057764547.1;Arabidopsis_thaliana|NP_172576.1
cluster9966	11	B5BT18	GO:1902185; P:positive regulation of shoot apical meristem development; IMP:UniProtKB	Oryza_sativa|XP_025879020.1;Theobroma_cacao|XP_017977127.1;Amborella_trichopoda|XP_011621494.1;Coffea_canephora|CDP16963.1;Tectona_grandis|Tg07g10800.t1;Vitis_vinifera|XP_010661187.1;Solanum_lycopersicum|XP_004246065.1;Leonurus_japonicus|Lj3g05330.1;Ajuga_decumbens|g28106.t1;Salvia_miltiorrhiza|XP_057799139.1;Arabidopsis_thaliana|NP_001190085.1
cluster9977	11	Q9SPK5	GO:0035999; P:tetrahydrofolate interconversion; IEA:UniProtKB-UniPathway	Oryza_sativa|XP_015612110.1;Theobroma_cacao|XP_017984778.1;Amborella_trichopoda|XP_006849543.1;Coffea_canephora|CDP17670.1;Tectona_grandis|Tg05g11510.t1;Vitis_vinifera|XP_002285654.1;Solanum_lycopersicum|XP_004228600.1;Leonurus_japonicus|Lj10g09740.1;Ajuga_decumbens|g29319.t1;Salvia_miltiorrhiza|XP_057776701.1;Arabidopsis_thaliana|NP_564571.1
cluster9979	11	P97852	GO:0048545; P:response to steroid hormone; IEP:RGD	Oryza_sativa|XP_015644522.1;Theobroma_cacao|XP_017980816.1;Amborella_trichopoda|XP_006838051.1;Coffea_canephora|CDP01360.1;Tectona_grandis|Tg03g17460.t1;Vitis_vinifera|XP_002284735.1;Solanum_lycopersicum|XP_004238156.1;Leonurus_japonicus|Lj6g20230.1;Ajuga_decumbens|g4885.t1;Salvia_miltiorrhiza|XP_057794501.1;Arabidopsis_thaliana|NP_199103.1
cluster9988	11	N/A	N/A	Oryza_sativa|XP_015612713.1;Theobroma_cacao|XP_007039460.1;Amborella_trichopoda|XP_006838605.1;Coffea_canephora|CDP13050.1;Tectona_grandis|Tg11g06660.t1;Solanum_lycopersicum|XP_004245908.1;Leonurus_japonicus|Lj3g12510.1;Ajuga_decumbens|g10779.t1;Salvia_miltiorrhiza|XP_057777754.1;Arabidopsis_thaliana|NP_567545.1;Vitis_vinifera|XP_002277674.1
cluster9994	11	Q9C9Q4	GO:0006898; P:receptor-mediated endocytosis; IBA:GO_Central	Oryza_sativa|XP_015632265.1;Theobroma_cacao|XP_017981629.1;Amborella_trichopoda|XP_006856110.1;Coffea_canephora|CDP07551.1;Tectona_grandis|Tg03g02150.t1;Vitis_vinifera|XP_002281702.1;Solanum_lycopersicum|XP_004238235.1;Leonurus_japonicus|Lj6g09650.1;Ajuga_decumbens|g5261.t1;Salvia_miltiorrhiza|XP_057793943.1;Arabidopsis_thaliana|NP_565101.1
cluster10008	11	B0G159	GO:0005509; F:calcium ion binding; IEA:InterPro	Oryza_sativa|XP_015628266.1;Theobroma_cacao|XP_007029124.1;Amborella_trichopoda|XP_006849581.1;Coffea_canephora|CDP07667.1;Tectona_grandis|Tg06g06450.t1;Vitis_vinifera|XP_002270910.1;Solanum_lycopersicum|XP_004229340.1;Leonurus_japonicus|Lj10g05050.1;Ajuga_decumbens|g20236.t1;Salvia_miltiorrhiza|XP_057807612.1;Arabidopsis_thaliana|NP_566015.1
cluster10009	11	Q9FT74	GO:0000724; P:double-strand break repair via homologous recombination; IBA:GO_Central	Oryza_sativa|XP_015616587.1;Theobroma_cacao|XP_017976346.1;Amborella_trichopoda|XP_006855323.1;Coffea_canephora|CDP18226.1;Tectona_grandis|Tg06g10290.t1;Vitis_vinifera|XP_010659681.1;Solanum_lycopersicum|XP_010313411.1;Leonurus_japonicus|Lj5g22380.1;Ajuga_decumbens|g20705.t1;Salvia_miltiorrhiza|XP_057792037.1;Arabidopsis_thaliana|NP_001327100.1
cluster10011	11	Q8GWQ2	GO:0045824; P:negative regulation of innate immune response; IMP:UniProtKB	Oryza_sativa|XP_015628254.1;Coffea_canephora|CDP00129.1;Theobroma_cacao|XP_017984146.1;Tectona_grandis|Tg12g04850.t1;Vitis_vinifera|XP_019079540.1;Leonurus_japonicus|Lj2g07430.1;Ajuga_decumbens|g1233.t1;Salvia_miltiorrhiza|XP_057804054.1;Arabidopsis_thaliana|NP_191115.1;Solanum_lycopersicum|XP_004239909.1;Amborella_trichopoda|XP_006846339.1
cluster10014	11	Q949T8	GO:0007275; P:multicellular organism development; IEA:UniProtKB-KW	Oryza_sativa|XP_015624503.1;Theobroma_cacao|XP_007013904.1;Amborella_trichopoda|XP_020523670.1;Coffea_canephora|CDP02859.1;Tectona_grandis|Tg01g07450.t1;Vitis_vinifera|XP_002272781.1;Solanum_lycopersicum|XP_010323211.1;Leonurus_japonicus|Lj10g13160.1;Ajuga_decumbens|g27225.t1;Salvia_miltiorrhiza|XP_057787808.1;Arabidopsis_thaliana|NP_567859.1
cluster10016	11	N/A	N/A	Oryza_sativa|XP_015628256.1;Theobroma_cacao|XP_017972098.1;Amborella_trichopoda|XP_006844461.1;Coffea_canephora|CDP18986.1;Tectona_grandis|Tg15g04640.t1;Vitis_vinifera|XP_002270985.1;Solanum_lycopersicum|XP_004239085.1;Leonurus_japonicus|Lj2g13650.1;Ajuga_decumbens|g6414.t1;Salvia_miltiorrhiza|XP_057773902.1;Arabidopsis_thaliana|NP_564300.1
cluster10019	11	Q9SXC8	GO:1990592; P:protein K69-linked ufmylation; IBA:GO_Central	Oryza_sativa|XP_015614638.1;Theobroma_cacao|XP_007018345.1;Amborella_trichopoda|XP_006852706.1;Coffea_canephora|CDP00961.1;Tectona_grandis|Tg03g00610.t1;Vitis_vinifera|XP_002285581.1;Solanum_lycopersicum|XP_004238037.1;Leonurus_japonicus|Lj6g18690.1;Ajuga_decumbens|g8245.t1;Salvia_miltiorrhiza|XP_057794240.1;Arabidopsis_thaliana|NP_564289.1
cluster10021	11	N/A	N/A	Oryza_sativa|XP_015650940.1;Theobroma_cacao|XP_007044238.1;Coffea_canephora|CDP00663.1;Tectona_grandis|Tg11g09980.t1;Vitis_vinifera|XP_002282799.1;Solanum_lycopersicum|XP_004238896.1;Leonurus_japonicus|Lj6g23150.1;Ajuga_decumbens|g10226.t1;Salvia_miltiorrhiza|XP_057810675.1;Arabidopsis_thaliana|NP_564925.1;Amborella_trichopoda|XP_006855796.1
cluster10027	11	Q9FIK0	GO:0006096; P:glycolytic process; ISS:TAIR	Oryza_sativa|XP_015635419.1;Theobroma_cacao|XP_017978943.1;Amborella_trichopoda|XP_006857658.1;Coffea_canephora|CDP04555.1;Tectona_grandis|Tg02g10730.t1;Vitis_vinifera|XP_003635479.1;Solanum_lycopersicum|XP_004236642.1;Leonurus_japonicus|Lj1g23800.1;Ajuga_decumbens|g15974.t1;Salvia_miltiorrhiza|XP_057765174.1;Arabidopsis_thaliana|NP_199592.1
cluster10033	11	Q9SV84	GO:0010036; P:response to boron-containing substance; IMP:TAIR	Oryza_sativa|XP_015614995.1;Theobroma_cacao|XP_007039259.1;Amborella_trichopoda|XP_006828763.1;Coffea_canephora|CDP12262.1;Tectona_grandis|Tg09g12790.t1;Vitis_vinifera|XP_002276319.1;Solanum_lycopersicum|NP_001274288.1;Leonurus_japonicus|Lj7g23070.1;Ajuga_decumbens|g25706.t1;Salvia_miltiorrhiza|XP_057787295.1;Arabidopsis_thaliana|NP_192776.1
cluster10077	11	F4JRR5	GO:0009960; P:endosperm development; IMP:TAIR	Oryza_sativa|XP_015612274.1;Theobroma_cacao|XP_017973535.1;Amborella_trichopoda|XP_011626937.1;Coffea_canephora|CDO98600.1;Tectona_grandis|Tg16g13480.t1;Vitis_vinifera|XP_019082099.1;Solanum_lycopersicum|XP_025885805.1;Leonurus_japonicus|Lj6g04560.1;Ajuga_decumbens|g28891.t1;Salvia_miltiorrhiza|XP_057812377.1;Arabidopsis_thaliana|NP_001328379.1
cluster10082	11	Q9FL69	GO:0060858; P:vesicle-mediated transport involved in floral organ abscission; IMP:UniProtKB	Oryza_sativa|XP_015647262.1;Theobroma_cacao|XP_017980519.1;Amborella_trichopoda|XP_006841803.1;Coffea_canephora|CDP05859.1;Tectona_grandis|TgUn186g00040.t1;Vitis_vinifera|XP_003634688.1;Solanum_lycopersicum|NP_001309328.1;Leonurus_japonicus|Lj5g24560.1;Ajuga_decumbens|g12292.t1;Salvia_miltiorrhiza|XP_057797272.1;Arabidopsis_thaliana|NP_568807.1
cluster10083	11	Q4FPT7	GO:0046295; P:glycolate biosynthetic process; IEA:UniProtKB-UniPathway	Oryza_sativa|XP_015645010.1;Theobroma_cacao|XP_007028494.1;Amborella_trichopoda|XP_006854788.1;Coffea_canephora|CDP09530.1;Tectona_grandis|Tg01g03150.t1;Vitis_vinifera|XP_002273524.1;Solanum_lycopersicum|NP_001334518.1;Leonurus_japonicus|Lj10g10320.1;Ajuga_decumbens|g26800.t1;Salvia_miltiorrhiza|XP_057785116.1;Arabidopsis_thaliana|NP_181658.1
cluster10088	11	Q9SFZ3	GO:0046983; F:protein dimerization activity; IEA:InterPro	Oryza_sativa|XP_015627200.1;Amborella_trichopoda|XP_020524714.1;Coffea_canephora|CDP07480.1;Tectona_grandis|Tg03g01340.t1;Vitis_vinifera|XP_010664722.1;Solanum_lycopersicum|XP_004238285.1;Leonurus_japonicus|Lj6g18270.1;Ajuga_decumbens|g5161.t1;Salvia_miltiorrhiza|XP_057794138.1;Arabidopsis_thaliana|NP_174087.1;Theobroma_cacao|XP_017972135.1
cluster10091	11	Q6EUK7	GO:0016567; P:protein ubiquitination; IDA:UniProtKB	Oryza_sativa|XP_015632524.1;Theobroma_cacao|XP_007010933.1;Amborella_trichopoda|XP_006854830.1;Coffea_canephora|CDP17287.1;Tectona_grandis|Tg06g08670.t1;Vitis_vinifera|XP_002264402.1;Solanum_lycopersicum|XP_004230032.1;Leonurus_japonicus|Lj9g06020.1;Ajuga_decumbens|g20479.t1;Salvia_miltiorrhiza|XP_057807904.1;Arabidopsis_thaliana|NP_849613.1
cluster10095	11	F4IQK5	GO:0045735; F:nutrient reservoir activity; IEA:InterPro	Oryza_sativa|XP_015632767.1;Theobroma_cacao|XP_017969293.1;Amborella_trichopoda|XP_011627755.1;Coffea_canephora|CDP02815.1;Vitis_vinifera|XP_010649177.1;Solanum_lycopersicum|XP_004233717.1;Leonurus_japonicus|Lj7g27370.1;Ajuga_decumbens|g21651.t1;Salvia_miltiorrhiza|XP_057770993.1;Arabidopsis_thaliana|NP_001325114.1;Tectona_grandis|Tg16g13080.t1
cluster10099	11	Q86UB9	GO:0032094; P:response to food; IEA:Ensembl	Oryza_sativa|XP_015647375.1;Theobroma_cacao|XP_017973991.1;Amborella_trichopoda|XP_006838527.1;Coffea_canephora|CDP19846.1;Tectona_grandis|Tg12g07720.t1;Vitis_vinifera|XP_002278821.1;Solanum_lycopersicum|XP_004235199.1;Leonurus_japonicus|Lj2g05080.1;Ajuga_decumbens|g864.t1;Salvia_miltiorrhiza|XP_057778511.1;Arabidopsis_thaliana|NP_199928.1
cluster10102	11	A0MFS5	GO:0015979; P:photosynthesis; IMP:TAIR	Oryza_sativa|XP_015637556.1;Theobroma_cacao|XP_017979173.1;Amborella_trichopoda|XP_006852647.1;Coffea_canephora|CDP08697.1;Tectona_grandis|Tg06g00820.t1;Vitis_vinifera|XP_002281157.1;Solanum_lycopersicum|XP_004231208.1;Leonurus_japonicus|Lj10g00700.1;Ajuga_decumbens|g20078.t1;Salvia_miltiorrhiza|XP_057778638.1;Arabidopsis_thaliana|NP_001118908.1
cluster10108	11	O80942	GO:0006355; P:regulation of transcription, DNA-templated; TAS:TAIR	Oryza_sativa|XP_015645557.1;Theobroma_cacao|XP_017972715.1;Arabidopsis_thaliana|NP_001328418.1;Amborella_trichopoda|XP_006847735.1;Coffea_canephora|CDP13009.1;Tectona_grandis|Tg11g06250.t1;Vitis_vinifera|XP_002278326.1;Solanum_lycopersicum|XP_004246181.1;Leonurus_japonicus|Lj3g12470.1;Ajuga_decumbens|g10658.t1;Salvia_miltiorrhiza|XP_057773484.1
cluster10124	11	Q9STM6	GO:0016042; P:lipid catabolic process; IEA:UniProtKB-KW	Oryza_sativa|XP_015632263.1;Theobroma_cacao|XP_017972189.1;Amborella_trichopoda|XP_006852134.1;Coffea_canephora|CDP15060.1;Tectona_grandis|Tg10g16090.t1;Vitis_vinifera|XP_002274810.1;Solanum_lycopersicum|XP_004236316.1;Leonurus_japonicus|Lj3g20700.1;Ajuga_decumbens|g29798.t1;Salvia_miltiorrhiza|XP_057791511.1;Arabidopsis_thaliana|NP_190416.1
cluster10127	11	O23038	GO:0045490; P:pectin catabolic process; IBA:GO_Central	Oryza_sativa|XP_015650404.1;Theobroma_cacao|XP_007049055.1;Amborella_trichopoda|XP_020517865.1;Coffea_canephora|CDP08865.1;Tectona_grandis|Tg10g07610.t1;Vitis_vinifera|XP_002267842.1;Solanum_lycopersicum|XP_004243648.1;Leonurus_japonicus|Lj3g22060.1;Ajuga_decumbens|g29961.t1;Salvia_miltiorrhiza|XP_057804877.1;Arabidopsis_thaliana|NP_172023.1
cluster10130	11	N/A	N/A	Oryza_sativa|XP_015624072.1;Amborella_trichopoda|XP_011623886.1;Coffea_canephora|CDP07000.1;Vitis_vinifera|XP_002272001.1;Solanum_lycopersicum|XP_004232652.1;Leonurus_japonicus|Lj3g04920.1;Arabidopsis_thaliana|NP_568234.1;Theobroma_cacao|XP_007011606.1;Tectona_grandis|Tg05g04550.t1;Ajuga_decumbens|g28102.t1;Salvia_miltiorrhiza|XP_057799242.1
cluster10161	11	Q9XI84	GO:0018023; P:peptidyl-lysine trimethylation; IDA:TAIR	Oryza_sativa|XP_015651332.1;Theobroma_cacao|XP_017971476.1;Amborella_trichopoda|XP_006827327.1;Coffea_canephora|CDP00367.1;Tectona_grandis|Tg15g11160.t1;Vitis_vinifera|XP_019076644.1;Solanum_lycopersicum|XP_004239106.1;Leonurus_japonicus|Lj9g19700.1;Ajuga_decumbens|g7593.t1;Salvia_miltiorrhiza|XP_057777209.1;Arabidopsis_thaliana|NP_172856.1
cluster10168	11	F4J8K6	GO:0006364; P:rRNA processing; IMP:TAIR	Oryza_sativa|XP_015647230.1;Theobroma_cacao|XP_017977277.1;Amborella_trichopoda|XP_020532096.1;Coffea_canephora|CDP14292.1;Tectona_grandis|Tg13g15900.t1;Vitis_vinifera|XP_010653854.1;Solanum_lycopersicum|XP_010317858.1;Leonurus_japonicus|Lj1g33110.1;Ajuga_decumbens|g13388.t1;Salvia_miltiorrhiza|XP_057768679.1;Arabidopsis_thaliana|NP_001326789.1
cluster10179	11	Q8GYX2	GO:0009744; P:response to sucrose; IEP:UniProtKB	Oryza_sativa|XP_015629322.1;Arabidopsis_thaliana|NP_197570.1;Leonurus_japonicus|Lj10g16040.1;Coffea_canephora|CDP20908.1;Theobroma_cacao|XP_017982844.1;Amborella_trichopoda|XP_006843916.1;Tectona_grandis|Tg01g11050.t1;Vitis_vinifera|XP_002276822.1;Solanum_lycopersicum|XP_004243694.1;Ajuga_decumbens|g27463.t1;Salvia_miltiorrhiza|XP_057767556.1
cluster10180	11	N/A	N/A	Oryza_sativa|XP_015632006.1;Theobroma_cacao|XP_017977926.1;Amborella_trichopoda|XP_006858916.1;Coffea_canephora|CDP08560.1;Tectona_grandis|Tg08g12870.t1;Vitis_vinifera|XP_019080603.1;Solanum_lycopersicum|XP_004230121.1;Leonurus_japonicus|Lj7g03420.1;Ajuga_decumbens|g2150.t1;Salvia_miltiorrhiza|XP_057780281.1;Arabidopsis_thaliana|NP_564660.1
cluster10191	11	N/A	N/A	Oryza_sativa|XP_015631008.1;Theobroma_cacao|XP_017974328.1;Amborella_trichopoda|XP_020529266.1;Coffea_canephora|CDO99399.1;Tectona_grandis|Tg08g04710.t1;Vitis_vinifera|XP_010650223.1;Solanum_lycopersicum|XP_010326809.1;Leonurus_japonicus|Lj4g23410.1;Ajuga_decumbens|g8770.t1;Salvia_miltiorrhiza|XP_057783593.1;Arabidopsis_thaliana|NP_001323014.1
cluster10195	11	Q9VQ26	GO:0048172; P:regulation of short-term neuronal synaptic plasticity; ISS:ParkinsonsUK-UCL	Oryza_sativa|XP_015631072.1;Theobroma_cacao|XP_017983573.1;Amborella_trichopoda|XP_020524659.1;Coffea_canephora|CDP09235.1;Tectona_grandis|Tg07g02260.t1;Vitis_vinifera|XP_010650872.1;Solanum_lycopersicum|XP_010323127.1;Leonurus_japonicus|Lj9g22160.1;Ajuga_decumbens|g7023.t1;Salvia_miltiorrhiza|XP_057789400.1;Arabidopsis_thaliana|NP_001332207.1
cluster10198	11	Q9R0Z7	GO:0015031; P:protein transport; IEA:UniProtKB-KW	Oryza_sativa|XP_015635478.1;Theobroma_cacao|XP_007046454.1;Amborella_trichopoda|XP_011627520.1;Coffea_canephora|CDP01767.1;Tectona_grandis|Tg06g05590.t1;Vitis_vinifera|XP_002276437.1;Solanum_lycopersicum|XP_004234504.1;Leonurus_japonicus|Lj7g14430.1;Ajuga_decumbens|g19632.t1;Salvia_miltiorrhiza|XP_057807524.1;Arabidopsis_thaliana|NP_569023.1
cluster10200	11	N/A	N/A	Oryza_sativa|XP_015620106.1;Theobroma_cacao|XP_017970425.1;Amborella_trichopoda|XP_020524741.1;Coffea_canephora|CDP06154.1;Tectona_grandis|Tg17g11230.t1;Vitis_vinifera|XP_002283386.1;Solanum_lycopersicum|XP_004243212.1;Leonurus_japonicus|Lj5g26620.1;Ajuga_decumbens|g12628.t1;Salvia_miltiorrhiza|XP_057796094.1;Arabidopsis_thaliana|NP_850380.1
cluster10206	11	Q01908	GO:0009772; P:photosynthetic electron transport in photosystem II; IMP:TAIR	Oryza_sativa|XP_015646852.1;Theobroma_cacao|XP_007026083.1;Amborella_trichopoda|XP_006855900.1;Coffea_canephora|CDP04403.1;Tectona_grandis|Tg02g12570.t1;Vitis_vinifera|XP_002275015.1;Solanum_lycopersicum|XP_004232711.1;Leonurus_japonicus|Lj1g25220.1;Ajuga_decumbens|g16177.t1;Salvia_miltiorrhiza|XP_057764892.1;Arabidopsis_thaliana|NP_567265.1
cluster10213	11	N/A	N/A	Oryza_sativa|XP_015647489.1;Theobroma_cacao|XP_007016188.1;Amborella_trichopoda|XP_006847907.1;Coffea_canephora|CDP09150.1;Tectona_grandis|Tg18g06590.t1;Vitis_vinifera|XP_002280509.1;Solanum_lycopersicum|XP_010316261.1;Leonurus_japonicus|Lj5g10960.1;Ajuga_decumbens|g3704.t1;Salvia_miltiorrhiza|XP_057772448.1;Arabidopsis_thaliana|NP_200700.1
cluster10215	11	N/A	N/A	Oryza_sativa|XP_015641247.1;Theobroma_cacao|XP_017969847.1;Amborella_trichopoda|XP_020518382.1;Coffea_canephora|CDO97698.1;Tectona_grandis|Tg06g03760.t1;Vitis_vinifera|XP_002281030.1;Solanum_lycopersicum|NP_001309050.1;Leonurus_japonicus|Lj10g03740.1;Ajuga_decumbens|g19757.t1;Salvia_miltiorrhiza|XP_057807386.1;Arabidopsis_thaliana|NP_850432.1
cluster10218	11	Q5HZP1	GO:0006401; P:RNA catabolic process; ISS:UniProtKB	Oryza_sativa|XP_015634999.1;Theobroma_cacao|XP_017973098.1;Amborella_trichopoda|XP_011623707.1;Coffea_canephora|CDP00379.1;Tectona_grandis|Tg11g11880.t1;Vitis_vinifera|XP_002281078.1;Solanum_lycopersicum|XP_019069584.1;Leonurus_japonicus|Lj6g26690.1;Ajuga_decumbens|g10058.t1;Salvia_miltiorrhiza|XP_057810789.1;Arabidopsis_thaliana|NP_001119020.1
cluster10222	11	Q9XIK3	GO:0097428; P:protein maturation by iron-sulfur cluster transfer; IEA:InterPro	Oryza_sativa|XP_015643471.1;Theobroma_cacao|XP_007048145.1;Amborella_trichopoda|XP_011622526.1;Coffea_canephora|CDP12883.1;Tectona_grandis|Tg07g15140.t1;Vitis_vinifera|XP_002279428.1;Solanum_lycopersicum|XP_004240009.1;Leonurus_japonicus|Lj4g09210.1;Ajuga_decumbens|g18393.t1;Salvia_miltiorrhiza|XP_057806962.1;Arabidopsis_thaliana|NP_172520.1
cluster10224	11	Q54UB1	GO:0030488; P:tRNA methylation; ISS:dictyBase	Oryza_sativa|XP_015633713.1;Theobroma_cacao|XP_017985398.1;Amborella_trichopoda|XP_006852744.1;Coffea_canephora|CDP07406.1;Tectona_grandis|Tg03g03450.t1;Vitis_vinifera|XP_002280127.1;Solanum_lycopersicum|XP_010320424.1;Leonurus_japonicus|Lj6g12070.1;Ajuga_decumbens|g3902.t1;Salvia_miltiorrhiza|XP_057794809.1;Arabidopsis_thaliana|NP_566054.1
cluster10229	11	O82413	GO:0006427; P:histidyl-tRNA aminoacylation; ISS:TAIR	Oryza_sativa|XP_015625872.1;Theobroma_cacao|XP_017976007.1;Amborella_trichopoda|XP_006833225.1;Coffea_canephora|CDP09568.1;Tectona_grandis|Tg01g03350.t1;Vitis_vinifera|XP_010653612.1;Solanum_lycopersicum|XP_004235763.1;Leonurus_japonicus|Lj10g10440.1;Ajuga_decumbens|g26836.t1;Salvia_miltiorrhiza|XP_057785264.1;Arabidopsis_thaliana|NP_190196.1
cluster10231	11	N/A	N/A	Oryza_sativa|XP_015639779.1;Theobroma_cacao|XP_017983758.1;Amborella_trichopoda|XP_006842592.1;Coffea_canephora|CDP04026.1;Tectona_grandis|Tg14g06720.t1;Vitis_vinifera|XP_002264084.1;Solanum_lycopersicum|XP_010326256.1;Leonurus_japonicus|Lj6g21230.1;Ajuga_decumbens|g23122.t1;Salvia_miltiorrhiza|XP_057789669.1;Arabidopsis_thaliana|NP_565700.1
cluster10246	11	O04212	GO:0005215; F:transporter activity; ISS:TAIR	Oryza_sativa|XP_015628093.1;Theobroma_cacao|XP_007008989.1;Amborella_trichopoda|XP_020525060.1;Coffea_canephora|CDP14028.1;Tectona_grandis|Tg07g04920.t1;Vitis_vinifera|XP_002270951.1;Solanum_lycopersicum|XP_004240944.1;Leonurus_japonicus|Lj8g15490.1;Ajuga_decumbens|g6737.t1;Salvia_miltiorrhiza|XP_057788888.1;Arabidopsis_thaliana|NP_565923.1
cluster10267	11	Q9C6I6	GO:0033539; P:fatty acid beta-oxidation using acyl-CoA dehydrogenase; IBA:GO_Central	Oryza_sativa|XP_015629762.1;Theobroma_cacao|XP_007020979.1;Amborella_trichopoda|XP_006855541.1;Coffea_canephora|CDP05786.1;Tectona_grandis|Tg02g06930.t1;Vitis_vinifera|XP_002281637.1;Solanum_lycopersicum|XP_004251475.1;Leonurus_japonicus|Lj1g16710.1;Ajuga_decumbens|g15470.t1;Salvia_miltiorrhiza|XP_057773665.1;Arabidopsis_thaliana|NP_175507.1
cluster10269	11	Q9S834	GO:0006515; P:protein quality control for misfolded or incompletely synthesized proteins; IBA:GO_Central	Oryza_sativa|XP_015628263.1;Theobroma_cacao|XP_017969621.1;Amborella_trichopoda|XP_020520585.1;Coffea_canephora|CDP17063.1;Tectona_grandis|Tg05g08480.t1;Vitis_vinifera|XP_002277104.1;Solanum_lycopersicum|NP_001334032.1;Leonurus_japonicus|Lj4g14580.1;Ajuga_decumbens|g29629.t1;Salvia_miltiorrhiza|XP_057776675.1;Arabidopsis_thaliana|NP_563657.1
cluster10270	11	Q9ZQE6	GO:0005509; F:calcium ion binding; IBA:GO_Central	Oryza_sativa|XP_015612685.1;Amborella_trichopoda|XP_011629231.1;Coffea_canephora|CDO97169.1;Tectona_grandis|Tg12g13280.t1;Vitis_vinifera|XP_002285223.1;Leonurus_japonicus|Lj7g06720.1;Ajuga_decumbens|g17207.t1;Salvia_miltiorrhiza|XP_057787525.1;Arabidopsis_thaliana|NP_179170.1;Theobroma_cacao|XP_017971472.1;Solanum_lycopersicum|XP_025884278.1
cluster10273	11	Q94K49	GO:0031936; P:negative regulation of chromatin silencing; IMP:UniProtKB	Oryza_sativa|XP_015644763.1;Theobroma_cacao|XP_017982539.1;Amborella_trichopoda|XP_006839025.1;Coffea_canephora|CDP16530.1;Tectona_grandis|Tg14g12430.t1;Vitis_vinifera|XP_003632343.1;Solanum_lycopersicum|XP_004242343.1;Leonurus_japonicus|Lj2g26290.1;Ajuga_decumbens|g22291.t1;Salvia_miltiorrhiza|XP_057800990.1;Arabidopsis_thaliana|NP_567144.1
cluster10275	11	Q9SY55	GO:0048364; P:root development; IMP:TAIR	Oryza_sativa|XP_015632272.1;Theobroma_cacao|XP_017981280.1;Amborella_trichopoda|XP_006857120.1;Coffea_canephora|CDP01269.1;Tectona_grandis|Tg08g10030.t1;Vitis_vinifera|XP_010664492.1;Solanum_lycopersicum|XP_004242949.1;Leonurus_japonicus|Lj4g19700.1;Ajuga_decumbens|g9694.t1;Salvia_miltiorrhiza|XP_057776543.1;Arabidopsis_thaliana|NP_563860.1
cluster10282	11	Q9SIH1	GO:0000413; P:protein peptidyl-prolyl isomerization; IBA:GO_Central	Oryza_sativa|XP_015649749.1;Theobroma_cacao|XP_007027839.1;Amborella_trichopoda|XP_006851476.1;Coffea_canephora|CDP10639.1;Tectona_grandis|Tg01g17790.t1;Vitis_vinifera|XP_002281866.1;Solanum_lycopersicum|XP_004246483.1;Leonurus_japonicus|Lj6g00210.1;Ajuga_decumbens|g3788.t1;Salvia_miltiorrhiza|XP_057777973.1;Arabidopsis_thaliana|NP_181157.1
cluster10289	11	P29344	GO:0003723; F:RNA binding; IEA:UniProtKB-KW	Oryza_sativa|XP_025879862.1;Theobroma_cacao|XP_007034140.1;Amborella_trichopoda|XP_006850233.1;Coffea_canephora|CDP10278.1;Tectona_grandis|Tg04g08810.t1;Vitis_vinifera|XP_002264430.1;Solanum_lycopersicum|XP_004248019.1;Leonurus_japonicus|Lj8g05940.1;Ajuga_decumbens|g19223.t1;Salvia_miltiorrhiza|XP_057773326.1;Arabidopsis_thaliana|NP_566737.1
cluster10291	11	Q0V7R1	GO:0045489; P:pectin biosynthetic process; IEA:UniProtKB-UniPathway	Oryza_sativa|XP_015637253.1;Theobroma_cacao|XP_007016224.1;Amborella_trichopoda|XP_006843824.1;Solanum_lycopersicum|XP_004238964.1;Coffea_canephora|CDP00576.1;Tectona_grandis|Tg15g12980.t1;Vitis_vinifera|XP_002281658.1;Leonurus_japonicus|Lj9g21250.1;Ajuga_decumbens|g7433.t1;Salvia_miltiorrhiza|XP_057765729.1;Arabidopsis_thaliana|NP_563925.1
cluster10297	11	Q9SF32	GO:0008017; F:microtubule binding; IDA:UniProtKB	Oryza_sativa|XP_015640404.1;Theobroma_cacao|XP_017983117.1;Amborella_trichopoda|XP_006833285.1;Tectona_grandis|Tg05g01370.t1;Vitis_vinifera|XP_002279054.1;Solanum_lycopersicum|XP_004245084.1;Leonurus_japonicus|Lj3g01990.1;Ajuga_decumbens|g27763.t1;Salvia_miltiorrhiza|XP_057799757.1;Coffea_canephora|CDP08282.1;Arabidopsis_thaliana|NP_180187.1
cluster10318	11	F4JJT9	GO:0006418; P:tRNA aminoacylation for protein translation; IEA:InterPro	Coffea_canephora|CDO97317.1;Theobroma_cacao|XP_007041410.1;Amborella_trichopoda|XP_006852765.1;Tectona_grandis|Tg08g14580.t1;Vitis_vinifera|XP_002271358.1;Solanum_lycopersicum|XP_004230674.1;Leonurus_japonicus|Lj7g02210.1;Oryza_sativa|XP_015622473.1;Ajuga_decumbens|g2013.t1;Salvia_miltiorrhiza|XP_057805254.1;Arabidopsis_thaliana|NP_001329757.1
cluster10329	11	Q54YG5	GO:0006888; P:ER to Golgi vesicle-mediated transport; IBA:GO_Central	Coffea_canephora|CDP10209.1;Theobroma_cacao|XP_007011967.1;Amborella_trichopoda|XP_020526907.1;Tectona_grandis|Tg01g08370.t1;Vitis_vinifera|XP_002279200.1;Solanum_lycopersicum|XP_004236654.1;Leonurus_japonicus|Lj9g08620.1;Oryza_sativa|XP_015611668.1;Ajuga_decumbens|g13253.t1;Salvia_miltiorrhiza|XP_057767851.1;Arabidopsis_thaliana|NP_200611.1
cluster10348	11	Q93YU8	GO:1901698; P:response to nitrogen compound; IEP:TAIR	Coffea_canephora|CDP18480.1;Theobroma_cacao|XP_017983187.1;Amborella_trichopoda|XP_006826988.1;Tectona_grandis|Tg16g01530.t1;Vitis_vinifera|XP_002281782.1;Solanum_lycopersicum|XP_004245249.1;Leonurus_japonicus|Lj3g09060.1;Oryza_sativa|XP_015637799.1;Ajuga_decumbens|g11207.t1;Salvia_miltiorrhiza|XP_057810440.1;Arabidopsis_thaliana|NP_197941.1
cluster10349	11	Q84WK4	GO:0010363; P:regulation of plant-type hypersensitive response; IMP:TAIR	Coffea_canephora|CDP04469.1;Theobroma_cacao|XP_017979210.1;Amborella_trichopoda|XP_006829542.1;Tectona_grandis|Tg02g11930.t1;Vitis_vinifera|XP_019074095.1;Solanum_lycopersicum|XP_004250250.1;Leonurus_japonicus|Lj1g24650.1;Oryza_sativa|XP_015635942.1;Ajuga_decumbens|g16099.t1;Salvia_miltiorrhiza|XP_057765004.1;Arabidopsis_thaliana|NP_001190797.1
cluster10352	11	P93050	GO:0006468; P:protein phosphorylation; IBA:GO_Central	Coffea_canephora|CDP03584.1;Theobroma_cacao|XP_017969675.1;Amborella_trichopoda|XP_006845812.1;Tectona_grandis|Tg14g13400.t1;Vitis_vinifera|XP_003632362.1;Solanum_lycopersicum|XP_004247481.1;Leonurus_japonicus|Lj2g27680.1;Oryza_sativa|XP_015629504.1;Ajuga_decumbens|g22384.t1;Salvia_miltiorrhiza|XP_057782508.1;Arabidopsis_thaliana|NP_182322.1
cluster10355	11	Q3EB59	GO:0051539; F:4 iron, 4 sulfur cluster binding; IBA:GO_Central	Coffea_canephora|CDO97990.1;Theobroma_cacao|XP_007024270.1;Amborella_trichopoda|XP_011626718.1;Tectona_grandis|Tg10g13780.t1;Vitis_vinifera|XP_002284038.1;Solanum_lycopersicum|XP_004235654.1;Leonurus_japonicus|Lj3g14880.1;Oryza_sativa|XP_015650345.1;Ajuga_decumbens|g31099.t1;Salvia_miltiorrhiza|XP_057773116.1;Arabidopsis_thaliana|NP_188251.1
cluster10356	11	O65499	GO:0006355; P:regulation of transcription, DNA-templated; TAS:TAIR	Coffea_canephora|CDP01373.1;Theobroma_cacao|XP_017970611.1;Amborella_trichopoda|XP_020532243.1;Tectona_grandis|Tg08g17810.t1;Vitis_vinifera|XP_010645909.1;Solanum_lycopersicum|XP_010322908.1;Leonurus_japonicus|Lj3g06990.1;Oryza_sativa|XP_025878826.1;Ajuga_decumbens|g17775.t1;Salvia_miltiorrhiza|XP_057805895.1;Arabidopsis_thaliana|NP_195254.1
cluster10361	11	Q9FZ47	GO:0009744; P:response to sucrose; IEP:TAIR	Coffea_canephora|CDO98271.1;Theobroma_cacao|XP_007026289.1;Amborella_trichopoda|XP_006845654.1;Tectona_grandis|Tg10g09840.t1;Vitis_vinifera|XP_003632910.1;Solanum_lycopersicum|NP_001295218.1;Leonurus_japonicus|Lj3g20120.1;Oryza_sativa|XP_015651084.1;Ajuga_decumbens|g29871.t1;Salvia_miltiorrhiza|XP_057791515.1;Arabidopsis_thaliana|NP_564010.1
cluster10362	11	A4YGN0	GO:0008270; F:zinc ion binding; IEA:InterPro	Coffea_canephora|CDO98669.1;Theobroma_cacao|XP_017969556.1;Amborella_trichopoda|XP_006858513.1;Tectona_grandis|Tg09g03600.t1;Vitis_vinifera|XP_002268625.1;Solanum_lycopersicum|XP_004239630.1;Leonurus_japonicus|Lj7g28760.1;Oryza_sativa|XP_015649891.1;Ajuga_decumbens|g24705.t1;Salvia_miltiorrhiza|XP_057770136.1;Arabidopsis_thaliana|NP_851257.1
cluster10363	11	Q9LIQ6	GO:0040008; P:regulation of growth; IEA:UniProtKB-KW	Coffea_canephora|CDO99386.1;Theobroma_cacao|XP_007034499.1;Amborella_trichopoda|XP_006854339.1;Tectona_grandis|Tg04g11730.t1;Vitis_vinifera|XP_002285610.1;Solanum_lycopersicum|XP_004247811.1;Leonurus_japonicus|Lj8g08880.1;Oryza_sativa|XP_015632032.1;Ajuga_decumbens|g19308.t1;Salvia_miltiorrhiza|XP_057772321.1;Arabidopsis_thaliana|NP_566742.1
cluster10369	11	Q9LI77	GO:0032543; P:mitochondrial translation; IEA:UniProtKB-UniRule	Coffea_canephora|CDP18737.1;Theobroma_cacao|XP_017984541.1;Amborella_trichopoda|XP_006832840.1;Tectona_grandis|Tg17g11610.t1;Vitis_vinifera|XP_002278150.1;Solanum_lycopersicum|XP_004248204.1;Leonurus_japonicus|Lj5g26840.1;Oryza_sativa|XP_025880871.1;Ajuga_decumbens|g12650.t1;Salvia_miltiorrhiza|XP_057796153.1;Arabidopsis_thaliana|NP_189194.1
cluster10370	11	Q921Y2	GO:0006364; P:rRNA processing; IGI:MGI	Coffea_canephora|CDP02348.1;Theobroma_cacao|XP_007050887.1;Amborella_trichopoda|XP_006858645.1;Tectona_grandis|Tg07g06480.t1;Vitis_vinifera|XP_002281732.1;Solanum_lycopersicum|NP_001335105.1;Leonurus_japonicus|Lj5g16720.1;Oryza_sativa|XP_015634044.1;Ajuga_decumbens|g18755.t1;Salvia_miltiorrhiza|XP_057768573.1;Arabidopsis_thaliana|NP_568321.1
cluster10372	11	Q9SZT8	GO:0009451; P:RNA modification; IBA:GO_Central	Coffea_canephora|CDP09324.1;Theobroma_cacao|XP_017982964.1;Amborella_trichopoda|XP_011623349.1;Tectona_grandis|Tg06g05910.t1;Vitis_vinifera|XP_019076721.1;Solanum_lycopersicum|XP_025886862.1;Leonurus_japonicus|Lj2g11250.1;Oryza_sativa|XP_015645712.1;Ajuga_decumbens|g19595.t1;Salvia_miltiorrhiza|XP_057807576.1;Arabidopsis_thaliana|NP_195454.1
cluster10375	11	N/A	N/A	Coffea_canephora|CDP00313.1;Theobroma_cacao|XP_017971412.1;Amborella_trichopoda|XP_006827178.1;Tectona_grandis|Tg15g10610.t1;Vitis_vinifera|XP_010657804.1;Solanum_lycopersicum|XP_004228397.1;Leonurus_japonicus|Lj9g19190.1;Oryza_sativa|XP_015633300.1;Ajuga_decumbens|g7658.t1;Salvia_miltiorrhiza|XP_057777160.1;Arabidopsis_thaliana|NP_178391.1
cluster10387	11	Q921I2	N/A	Coffea_canephora|CDP15054.1;Theobroma_cacao|XP_017974086.1;Amborella_trichopoda|XP_011626150.1;Tectona_grandis|Tg10g09110.t1;Vitis_vinifera|XP_002276501.1;Solanum_lycopersicum|XP_010319054.1;Leonurus_japonicus|Lj3g20730.1;Oryza_sativa|XP_015637234.1;Ajuga_decumbens|g29806.t1;Salvia_miltiorrhiza|XP_057799521.1;Arabidopsis_thaliana|NP_568723.1
cluster10398	11	Q9SGD2	GO:0006486; P:protein glycosylation; IEA:InterPro	Theobroma_cacao|XP_017983687.1;Amborella_trichopoda|XP_006851485.1;Coffea_canephora|CDP06937.1;Tectona_grandis|Tg14g02430.t1;Vitis_vinifera|XP_002277132.1;Solanum_lycopersicum|XP_004241316.1;Leonurus_japonicus|Lj10g07480.1;Oryza_sativa|XP_015621154.1;Ajuga_decumbens|g23480.t1;Salvia_miltiorrhiza|XP_057806226.1;Arabidopsis_thaliana|NP_172305.1
cluster10402	11	Q920F5	GO:0002931; P:response to ischemia; IMP:UniProtKB	Theobroma_cacao|XP_017979115.1;Amborella_trichopoda|XP_006845110.1;Coffea_canephora|CDP04440.1;Tectona_grandis|Tg17g04530.t1;Vitis_vinifera|XP_010655364.1;Solanum_lycopersicum|XP_025884994.1;Leonurus_japonicus|Lj1g06800.1;Oryza_sativa|XP_015651152.1;Ajuga_decumbens|g11805.t1;Salvia_miltiorrhiza|XP_057795053.1;Arabidopsis_thaliana|NP_974511.1
cluster10412	11	Q86KL4	GO:0002188; P:translation reinitiation; IBA:GO_Central	Theobroma_cacao|XP_017977011.1;Amborella_trichopoda|XP_020520619.1;Coffea_canephora|CDP17205.1;Tectona_grandis|Tg11g05560.t1;Vitis_vinifera|XP_010659658.1;Solanum_lycopersicum|XP_010313189.1;Leonurus_japonicus|Lj2g26500.1;Oryza_sativa|XP_015612464.1;Ajuga_decumbens|g25831.t1;Salvia_miltiorrhiza|XP_057770576.1;Arabidopsis_thaliana|NP_172387.1
cluster10416	11	Q67XG0	GO:0001666; P:response to hypoxia; IEP:TAIR	Theobroma_cacao|XP_017983796.1;Amborella_trichopoda|XP_006842233.1;Coffea_canephora|CDP18482.1;Tectona_grandis|Tg05g02890.t1;Vitis_vinifera|XP_002284484.1;Solanum_lycopersicum|XP_004245251.1;Leonurus_japonicus|Lj3g03180.1;Oryza_sativa|XP_015640966.1;Ajuga_decumbens|g27890.t1;Salvia_miltiorrhiza|XP_057799641.1;Arabidopsis_thaliana|NP_567901.1
cluster10428	11	Q9LL84	GO:0010165; P:response to X-ray; IMP:TAIR	Theobroma_cacao|XP_017983367.1;Amborella_trichopoda|XP_020526887.1;Coffea_canephora|CDP15784.1;Tectona_grandis|Tg01g13680.t1;Vitis_vinifera|XP_002263967.1;Solanum_lycopersicum|XP_004242917.1;Leonurus_japonicus|Lj5g02400.1;Oryza_sativa|XP_015636869.1;Ajuga_decumbens|g4669.t1;Salvia_miltiorrhiza|XP_057790203.1;Arabidopsis_thaliana|NP_001332576.1
cluster10433	11	Q6TGY8	GO:0034975; P:protein folding in endoplasmic reticulum; IBA:GO_Central	Theobroma_cacao|XP_007030614.1;Amborella_trichopoda|XP_006838989.1;Coffea_canephora|CDP08539.1;Tectona_grandis|Tg05g12660.t1;Vitis_vinifera|XP_002277809.1;Solanum_lycopersicum|XP_004230116.1;Leonurus_japonicus|Lj7g09460.1;Oryza_sativa|XP_015622854.1;Ajuga_decumbens|g2395.t1;Salvia_miltiorrhiza|XP_057798304.1;Arabidopsis_thaliana|NP_850995.1
cluster10434	11	O74415	GO:0000463; P:maturation of LSU-rRNA from tricistronic rRNA transcript (SSU-rRNA, 58S rRNA, LSU-rRNA); ISO:PomBase	Theobroma_cacao|XP_017980621.1;Amborella_trichopoda|XP_011628497.1;Coffea_canephora|CDO99760.1;Tectona_grandis|Tg12g02550.t1;Vitis_vinifera|XP_010644438.1;Solanum_lycopersicum|XP_010317142.1;Leonurus_japonicus|Lj2g04090.1;Oryza_sativa|XP_015636134.1;Ajuga_decumbens|g1557.t1;Salvia_miltiorrhiza|XP_057798932.1;Arabidopsis_thaliana|NP_001320074.1
cluster10449	11	Q93VC7	GO:0006412; P:translation; IBA:GO_Central	Theobroma_cacao|XP_017975185.1;Amborella_trichopoda|XP_006841606.1;Coffea_canephora|CDO98727.1;Tectona_grandis|Tg04g00340.t1;Vitis_vinifera|XP_002280604.1;Solanum_lycopersicum|XP_004229034.1;Leonurus_japonicus|Lj8g00300.1;Oryza_sativa|XP_015628466.1;Ajuga_decumbens|g21664.t1;Salvia_miltiorrhiza|XP_057809774.1;Arabidopsis_thaliana|NP_850903.1
cluster10480	11	Q9LXF4	GO:0005739; C:mitochondrion; IBA:GO_Central	Vitis_vinifera|XP_002278558.1;Theobroma_cacao|XP_017974791.1;Amborella_trichopoda|XP_006840156.1;Coffea_canephora|CDP02249.1;Tectona_grandis|Tg05g04960.t1;Solanum_lycopersicum|XP_010317108.1;Leonurus_japonicus|Lj5g19240.1;Oryza_sativa|XP_015631570.1;Ajuga_decumbens|g18691.t1;Salvia_miltiorrhiza|XP_057788021.1;Arabidopsis_thaliana|NP_197032.1
cluster10487	11	N/A	N/A	Vitis_vinifera|XP_010653227.1;Theobroma_cacao|XP_017977129.1;Amborella_trichopoda|XP_006826385.1;Coffea_canephora|CDP10549.1;Tectona_grandis|Tg01g18610.t1;Solanum_lycopersicum|XP_004229131.1;Leonurus_japonicus|Lj6g01100.1;Oryza_sativa|XP_015619884.1;Ajuga_decumbens|g3861.t1;Salvia_miltiorrhiza|XP_057784700.1;Arabidopsis_thaliana|NP_001330149.1
cluster10490	11	Q9FHK0	GO:0006511; P:ubiquitin-dependent protein catabolic process; IDA:TAIR	Vitis_vinifera|XP_002270881.1;Theobroma_cacao|XP_017973238.1;Amborella_trichopoda|XP_006878619.1;Coffea_canephora|CDP07202.1;Tectona_grandis|Tg16g03000.t1;Solanum_lycopersicum|XP_004246015.1;Leonurus_japonicus|Lj3g27750.1;Oryza_sativa|XP_015643512.1;Ajuga_decumbens|g11357.t1;Salvia_miltiorrhiza|XP_057766753.1;Arabidopsis_thaliana|NP_568643.1
cluster10494	11	Q8VCE1	GO:0006890; P:retrograde vesicle-mediated transport, Golgi to ER; IBA:GO_Central	Vitis_vinifera|XP_002263825.1;Theobroma_cacao|XP_007027533.1;Amborella_trichopoda|XP_006836118.1;Coffea_canephora|CDP15317.1;Tectona_grandis|Tg13g10530.t1;Solanum_lycopersicum|XP_004249650.1;Leonurus_japonicus|Lj9g13030.1;Oryza_sativa|XP_015650055.1;Ajuga_decumbens|g13981.t1;Salvia_miltiorrhiza|XP_057785696.1;Arabidopsis_thaliana|NP_568123.1
cluster10506	11	Q9LF46	GO:0001561; P:fatty acid alpha-oxidation; IBA:GO_Central	Oryza_sativa|XP_015616825.1;Theobroma_cacao|XP_017975490.1;Amborella_trichopoda|XP_006837289.1;Coffea_canephora|CDP02739.1;Tectona_grandis|Tg06g18190.t1;Vitis_vinifera|XP_002266004.1;Solanum_lycopersicum|XP_004232017.1;Leonurus_japonicus|Lj2g00820.1;Ajuga_decumbens|g121.t1;Salvia_miltiorrhiza|XP_057798735.1;Arabidopsis_thaliana|NP_197240.1
cluster10512	11	Q6DGL7	GO:0016021; C:integral component of membrane; IEA:UniProtKB-KW	Oryza_sativa|XP_015630520.1;Theobroma_cacao|XP_007017400.1;Amborella_trichopoda|XP_006856224.1;Coffea_canephora|CDP07596.1;Tectona_grandis|Tg18g04670.t1;Vitis_vinifera|XP_002284036.1;Solanum_lycopersicum|XP_004252777.1;Leonurus_japonicus|Lj4g16060.1;Ajuga_decumbens|g31866.t1;Salvia_miltiorrhiza|XP_057765953.1;Arabidopsis_thaliana|NP_564509.1
cluster10527	11	Q9SAH5	GO:0008654; P:phospholipid biosynthetic process; IMP:TAIR	Oryza_sativa|XP_015625309.1;Theobroma_cacao|XP_007023437.1;Amborella_trichopoda|XP_011628056.1;Coffea_canephora|CDO98231.1;Vitis_vinifera|XP_002265564.1;Solanum_lycopersicum|XP_004241679.1;Leonurus_japonicus|Lj4g02030.1;Ajuga_decumbens|g26231.t1;Salvia_miltiorrhiza|XP_057787829.1;Arabidopsis_thaliana|NP_565246.1;Tectona_grandis|Tg16g10160.t1
